1 *Short title:* Bacterial diversity in feces of wild birds from the Pacific Northwest

2

3 RESEARCH ARTICLE

4 **Bacterial Diversity in Feces of Wild Bald Eagles, Turkey Vultures**  
5 **and Common Ravens from the Pacific Northwest Coast, U.S.A.**

6 Rocio Crespo,<sup>1#\*\*¶</sup> Scot E Dowd<sup>2</sup>, Daniel E. Varland<sup>3¶</sup>, Scott Ford<sup>4</sup> and Thomas E. Hamer<sup>5</sup>

7

8 <sup>1</sup> Avian Health and Food Safety Laboratory, Washington Animal Disease Diagnostic Laboratory,  
9 Washington State University, Puyallup, Washington, United States of America.

10

11 <sup>2</sup> MR DNA (Molecular Research), 503 Clovis Road Shallowater, Texas, United States of  
12 America

13

14 <sup>3</sup> Coastal Raptors, 90 Westview Drive, Hoquiam, Washington, United States of America

15

16 <sup>4</sup> Avian Specialty Veterinary Services, 519 S 68<sup>th</sup> St, Milwaukee, Wisconsin, United States of  
17 America

18

19 <sup>5</sup> Hamer Environmental, L.P., P.O. Box 2561, Mount Vernon, Washington, United States of  
20 America

21

22 <sup>#</sup>Current Address: Department of Population Health and Pathobiology, College of Veterinary  
23 Medicine, North Carolina State University, Raleigh, North Carolina, United States of America

24

25

26 \*Corresponding author

27 E-mail: [rcrespo@ncsu.edu](mailto:rcrespo@ncsu.edu) (RC)

28

29

30 <sup>¶</sup>These authors contributed equally to this work.

## 31 **Abstract**

32           Birds harbor diverse microorganisms in their guts, which collectively fulfill important  
33 roles in providing their hosts with nutrition and protection from pathogens. Although numerous  
34 studies have investigated the presence of certain pathogenic bacteria in the feces of wild birds,  
35 only a few have attempted to investigate the microbiota of the gut. This study analyzed the avian  
36 bacteria present in the cloaca of avian scavengers captured on coastal beaches of Washington and  
37 Oregon between 2013 and 2015: 10 turkey vultures (*Cathartes aura*), 9 bald eagles (*Haliaeetus*  
38 *leucocephalus*), and 2 common ravens (*Corvus corax*). We used illumina sequencing based on  
39 the V4 region of the 16s gene was to characterize the bacterial diversity. Our investigation  
40 revealed phylum-level differences in the microbiome of turkey vultures, compared with bald  
41 eagles and common ravens. Substantial microbiome differences were found between bald eagles  
42 and ravens below the phylum level. Although little is known about the possible relations among  
43 these microorganisms, our analyses provides the first integrated look at the composition of the  
44 avian microbiota and serves as a foundation for future studies in this area.

45

46 *Keywords:* avian scavenger, turkey vulture, bald eagle, common raven, bacteria, coast,  
47 microbiota, microbiome, raptor.

48 *Abbreviations:* OTU = operational taxonomic unit

49

50

## 51 **Introduction**

52           Birds harbor diverse microorganisms in their gut, which collectively fulfill important  
53 roles in providing their hosts with nutrition and protection from pathogens [1]. Gut  
54 microorganisms have been isolated and characterized by a variety of methods, such as culture-  
55 based assays, culture-independent DNA sequencing, and fluorescence *in situ* hybridization  
56 targeting the 16S rRNA gene [2]. Most of these studies are limited in scope and are focused on  
57 pathogenic bacteria such as *Salmonella*, *Escherichia coli*, *Campylobacter*, and *Clostridium*  
58 *perfringens* [3-5].

59           In recent years, metagenomics using next-generation sequencing has emerged as a way to  
60 analyze complex microbial communities and their functions [6]. This approach is capable of  
61 sequencing thousands or millions of amplified DNA molecules in a single run and, for bacteria,  
62 does not require conventional cloning and amplification. Additionally, metagenomic studies  
63 offer a powerful tool for the comprehensive and unbiased assessment of microbial diversity  
64 within the complex gut ecosystem by allowing examination of organisms not easily cultured in  
65 the laboratory [6, 7].

66           Few studies have used genetic sequencing to explore the intestinal microbiota of wild  
67 birds [8]. Furthermore, these studies reported gene sequences to phylum or class levels only,  
68 with no attempt to understand extant microorganism populations at the species level. In this  
69 study, we analyze the avian microbiome present in the cloaca of bald eagles, turkey vultures, and  
70 common ravens collected in coastal Washington and Oregon, U.S.A. Because research has  
71 demonstrated that intestinal microorganisms can influence the lifecycle and reproduction of their  
72 hosts [9], data presented in this paper can be important for a better understanding of the health

73 and nutrition of these apex scavengers that comprise key components of the food web of the  
74 Pacific Northwest coast.

75

## 76 **Materials and methods**

77 We captured avian scavengers in coastal Washington and Oregon with a carcass-baited  
78 net launcher [10]. We captured turkey vultures and common ravens from May through August  
79 and bald eagles from February through June. Once in hand, we marked birds for identification  
80 with visual identification leg bands (eagles and ravens) or patagial tags (vultures) [11].

81 *Aging.* We assigned captured birds to two age classes, adult and immature. We classified  
82 bald eagles as adults ( $\geq 4$  years old) with attainment of fully white head and tail plumage, yellow  
83 beak and yellow iris [12]. We classified turkey vultures as adults ( $\geq 2$  years old) with attainment  
84 of a bright ivory bill [13]. Common ravens were ranked as adults ( $\geq 1$  years old) by having  
85 glossy black wing and tail feathers and as immatures by having dull black or brownish wing and  
86 tail feathers [14].

87 *Sexing.* When possible, we determined the sex of individuals using measurements. We  
88 sexed bald eagles using bill depth and hallux length measurements [15] and common ravens  
89 using foot pad length and body mass [16]. Using this approach, the sex of one raven captured  
90 was equivocal. In this case, we classified the individual as female because we observed it with  
91 another raven that we assumed was male based on its demonstrably larger size [17]. We did not  
92 sex captured turkey vultures because it is not possible to differentiate gender using plumage  
93 characteristics or measurements [13].

94 *Fecal sampling.* We extracted up to 2 ml of fecal material directly from the cloaca of  
95 each bird using a disposable 3 ml pipette. In the field, we transferred fecal samples to cryovials

96 and then placed them in a pre-frozen Golden Hour Thermal Container ([www.credothermal.com](http://www.credothermal.com)).  
97 With no more than 8 hours of elapsed time, samples were stored at -20°C for up to one month  
98 and then at -70°C until processed in 2017.

99 Genetic sequencing of all 21 cloaca flora samples was conducted by MR DNA,  
100 Molecular Research, LP ([www.MrDNAlab.com](http://www.MrDNAlab.com); Shallowater, Texas). In summary, the 16S  
101 rRNA gene V4 variable region PCR primers 515/806 were used in a single-step 30 cycle PCR  
102 using the HotStarTaq Plus Master Mix Kit (Qiagen, USA) under the following conditions: 94°C  
103 for 3 minutes, followed by 30 cycles of 94°C for 30 seconds, 53°C for 40 seconds and 72°C for 1  
104 minute, after which a final, 5-minute elongation step at 72°C was performed on a MiSeq system  
105 (Illumina Inc, San Diego, California). After amplification, PCR products were checked in 2%  
106 agarose gel to determine the success of amplification and the relative intensity of bands. Samples  
107 were pooled and purified using calibrated Ampure XP beads (Beckman Coulter, Life Sciences,  
108 Indianapolis, Indiana). This purified PCR product was then used to prepare an Illumina DNA library  
109 (<https://www.illumina.com/techniques/sequencing/ngs-library-prep.html>).

110 Sequence paired ends were processed using MR DNA taxonomic analysis pipeline  
111 ([www.MrDNAlab.com](http://www.MrDNAlab.com)). In summary, the process included depletion of barcodes and primers  
112 from genetic sequences, paired sequences were merged, followed by removal of sequences  
113 <150bp, and then removal of sequences with ambiguous base calls and homopolymer runs  
114 exceeding 6bp. Following these steps, operational taxonomic units (OTUs) were generated at  
115 97% homology and chimeras were removed. Final OTUs were taxonomically classified using  
116 BLASTn (<https://blast.ncbi.nlm.nih.gov/Blast.cgi>) against a database derived from Ribosomal  
117 Database Project II (<http://rdp.cme.msu.edu>) and the National Center for Biotechnical  
118 Information ([www.ncbi.nlm.nih.gov](http://www.ncbi.nlm.nih.gov)). When a given sequence matched < 77% of a reference  
119 sequence, no taxonomic identity was assigned. To designate a sequence in a phylum the

120 sequence was at least 77% identical to the reference sequence, for the class >80%, for the order >  
121 85%, > 90% for the family, > 95% for the genus, and for the species >97%. We acknowledge  
122 that use of the V4 region of the 16s does not give more than a tentative evaluation of the lower  
123 phylogenetic levels (e.g. genus and species), yet we feel that some discussion of the findings in  
124 terms of genus and species provided interesting insight as part of this unique survey. Normalized  
125 to 20,000 sequences per sample, Alpha and Beta diversity analyses were completed using the  
126 Qiime2 [18] microbiome analysis pipeline (<https://qiime2.org/>).

127

## 128 **Results**

129 We captured and sampled 10 turkey vultures, 9 bald eagles and 2 common ravens.  
130 Except for one turkey vulture captured on an Oregon coastal beach, all individuals were captured  
131 on southwest Washington coastal beaches or adjacent to Grays Harbor (Fig 1). Eight of the  
132 turkey vultures were adults and two were immatures. Three of the bald eagles were adults and  
133 six were immature; six were male and four were female. One common raven was an adult female  
134 and the other was an immature male. We collected one fecal sample from each individual for a  
135 total of 21 samples.

136

### 137 **Fig 1. Avian scavenger sampling sites.**

138 Locations where fecal samples were collected from turkey vultures, bald eagles and common  
139 ravens in coastal Washington and Oregon. Numbers next to squares show the number of avian  
140 scavengers trapped at that location.

141

142 Genetic sequencing resulted in 1,905,510 sequences from the 21 samples we collected.  
143 Bacterial OTUs comprised 99.7% of the sequences found; 0.006% were Archaea. The other  
144 0.25% constituted sparse cross-reactions of the primers with eukaryotes [19].

145 The total number of bacterial taxonomic OTUs detected among the 21 samples was 1065.  
146 Turkey vultures presented the largest diversity of bacterial fecal microbiome (1022 OTUs;  $n =$   
147 10), followed by common ravens (454 OTUs;  $n = 2$ ), and bald eagles (604 OTUs;  $n = 9$ ). In  
148 turkey vultures, 183 bacteria genera were identified, 141 in bald eagles, and 131 in common  
149 ravens (Table 1). Rare faction curves of observed OTUs and Shannon diversity indices were  
150 generated based on a rarefaction level of 20,000 sequences per sample (Fig 2). Non-parametric  
151 pairwise comparisons made between turkey vultures and bald eagles (Fig 3) revealed significant  
152 differences in the number of observed OTUs ( $p < 0.001$ ) as well as Shannon diversity indices  
153 between the two species ( $p < 0.001$ ). The alpha diversity of turkey vultures was found to be  
154 significantly greater than the alpha diversity of bald eagles with regards to both measured alpha  
155 diversity metrics. Corresponding with alpha diversity analyses, based on ANOSIM pairwise  
156 comparisons (S1 Table), beta diversity between the turkey vultures and both the bald eagles as  
157 well as the common raven is shown. Beta diversity comparisons were based on the weighted  
158 unifrac distance matrix values which can be better visualized via principal coordinate analysis  
159 (PCoA) plot (Fig 4).

160

161 **Table 1. Number of bacteria taxonomic groups.**

| Avian Species  | Bacteria Taxonomy |       |       |        |                 |
|----------------|-------------------|-------|-------|--------|-----------------|
|                | Phylum            | Class | Order | Family | Tentative Genus |
| Turkey vulture | 13                | 23    | 49    | 94     | 183             |
| Bald eagle     | 12                | 22    | 43    | 78     | 141             |
| Common raven   | 12                | 19    | 39    | 76     | 131             |

162 Number of bacteria taxonomic groups identified in fecal samples collected from turkey vultures  
163 (n = 10), bald eagles (n = 9) and common ravens (n = 2) captured on coastal beaches in  
164 Washington and Oregon.

165

166 **Fig 2. OTU Rarefaction and Shannon Diversity Index Curve.**

167 16s rRNA sequence data was rarefied to 20,000 sequences per sample. (A) OTUs and (B)  
168 Shannon diversity indices were plotted for three avian species; Bald Eagle (n=9), Common  
169 Raven (n=2), and Turkey Vulture (n=10). OTUs were clustered at 97% identity.

170

171 **Fig 3. Kruskal-Wallis Pairwise Results (Observed OTUs).**

172 Significant differences present in alpha diversity metrics: (A) Observed OTUs and (B) Shannon  
173 diversity indices; were identified using the non-parametric Kruskal-Wallis H Test and  
174 differences between groups identified using multiple pairwise comparisons. Comparisons  
175 involving the Common Raven were not reported due to limited sample size (n=2).

176

177 **Fig 4. Weighted UniFrac PCoA.**

178 Principal coordinate plot of weighted UniFrac [18] data with colors keyed on the three avian  
179 species sampled. Bald Eagle (n=9; Red), Common Raven (n=2; blue), and Turkey Vulture  
180 (n=10; orange). The phylogenetic assemblage of the Turkey Vultures is clearly distinct from the  
181 remaining two sampled species.

182

183 The proportions of bacterial OTUs varied by phylum for each bird in the study (Fig 5).

184 Thirteen phyla were represented among bacteria detected in the fecal samples (Fig 5, S1 Figure,



185 and S2 Table). Overall, more than 80% of the bacterial sequences detected belonged to two  
186 phyla, Firmicutes and Proteobacteria. In turkey vultures, the two most common phyla were  
187 Firmicutes and Fusobacteria and in bald eagles and common ravens Firmicutes and  
188 Proteobacteria were most common.

189

190 **Fig 5. Mean proportions of bacterial operational taxonomic units by phylum.**

191 Mean proportions of bacterial operational taxonomic units by phylum detected in fecal samples  
192 collected from turkey vultures (n = 10) bald eagles (n = 9), and common ravens (n = 2) captured  
193 on coastal beaches in Washington and Oregon. Proportions < 1% are not shown.

194

195 Twenty-three classes of bacteria were represented in the fecal samples. In turkey vultures,  
196 class Clostridia contained the highest proportions of OTUs by individual, while in bald eagles  
197 class Betaprotobacteria held this distinction (Fig 6). The two common raven fecal samples also  
198 included OTUs in class Betaproteobacteria, with a larger proportion of OTUs in the sample from  
199 the adult.

200

201 **Fig 6. Proportions of bacterial operational taxonomic units by class.**

202 Proportions of bacterial operational taxonomic units by class detected in fecal samples from  
203 turkey vultures (n=10), bald eagles (n = 9) and common ravens (n = 2) captured on coastal  
204 beaches in Washington and Oregon. Letters below columns are the visual identification codes on  
205 bands (eagles and ravens) or wing-tags (vultures) applied to birds at capture. Proportions < 1%  
206 are not shown.

207

208           A total of 188 tentative bacterial genera were represented in the feces of the three avian  
209 species. Of the 183 different genera detected in the 10 turkey vulture samples, 18 genera  
210 accounted for 90% of the bacterial sequences, with two genera, *Clostridium* and *Fusobacterium*,  
211 comprising 48% of the total on average (Table 2). A total of 141 genera were detected in the nine  
212 bald eagle samples and 14 of these genera represented 90% of all sequences detected. The two  
213 most common, *Burkholderia* and *Pseudomonas*, comprised 36% of the total on average (Table  
214 2). While only two common ravens were sampled, 131 bacterial genera were detected with 9 of  
215 these comprising 90% of the OTUs (Table 2). Based on hierarchal clustering of the top 35  
216 genera detected amongst the three species, there is a clear distinction between the fecal  
217 microbiome of turkey vultures and that of the bald eagle (Fig 4).

218

219

220 **Table 2. Proportions of bacterial operational taxonomic units by genus.**

221

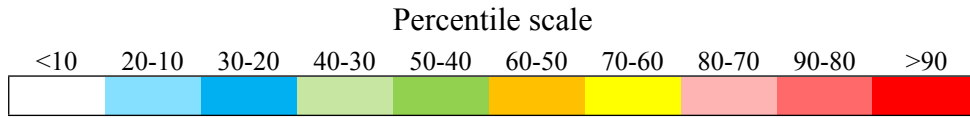

222

223

A) Turkey Vulture

| Genus              | Individual Patagial Tag ID Codes |       |       |       |       |       |       |       |        |       | Average |
|--------------------|----------------------------------|-------|-------|-------|-------|-------|-------|-------|--------|-------|---------|
|                    | CA                               | AR    | HE    | AY    | BV    | AV    | AL    | BY    | AK     | AX    |         |
| Enterococcus       | 0.16                             | 0.03  | 15.08 | 0.05  | 0.06  | 0.55  | 0.16  | 0.1   | 0.03   | 0.03  | 1.63    |
| Vagococcus         | 0.04                             | 0.03  | 9.72  | 0.04  | 0.03  | 0.2   | 0.14  | 0.58  | 0.02   | 0.07  | 1.09    |
| Lactobacillus      | 1.01                             | 0.13  | 1.41  | 2.36  | 0.12  | 7.28  | 18.01 | 1.34  | 0.08   | 12.4  | 4.42    |
| Clostridium        | 22.69                            | 4.25  | 34.99 | 18.06 | 9.86  | 49.1  | 50.35 | 28.14 | 66.49  | 33.31 | 31.66   |
| Peptostreptococcus | 7.31                             | 5.94  | 0.48  | 8.47  | 16.18 | 18.03 | 2.45  | 4.86  | 1.55   | 1.3   | 6.66    |
| Ruminococcus       | 5.34                             | 34.66 | 0.06  | 0.44  | 0.08  | 0.06  | 0.1   | 12.09 | 0.07   | 2.68  | 5.56    |
| Anaerovorax        | 0.42                             | 8.4   | 0.02  | 0.41  | 1.37  | 0.04  | 0.27  | 0.45  | 0.14   | 1.33  | 1.28    |
| Eubacterium        | 3.12                             | 3.01  | 0.19  | 3.43  | 0.08  | 5.34  | 0.4   | 3.32  | 0.61   | 0.11  | 1.96    |
| Cellulosilyticum   | 1.99                             | 0.05  | 0.14  | 0.53  | 0.04  | 0.14  | 0.33  | 0.06  | 8.46   | 2.94  | 1.47    |
| Peptoclostridium   | 0.42                             | 0.74  | 1.5   | 1.58  | 0.53  | 0.93  | 14.42 | 1.04  | 0.42   | 0.18  | 2.14    |
| Holdemania         | 0.06                             | 7.72  | 0.02  | 1.92  | 0.01  | 0.02  | 0.02  | 0.01  | 0.32   | 0.01  | 1.01    |
| Peptoniphilus      | 1                                | 8.99  | 0.09  | 1.65  | 9.97  | 0.69  | 0.22  | 18.07 | 0.11   | 0.05  | 4.08    |
| Atopobium          | 3.74                             | 6.71  | 0.07  | 10.67 | 0.04  | 0.12  | 0.32  | 6.94  | 2.84   | 6.46  | 3.79    |
| Fusobacterium      | 38.98                            | 9.96  | 4.04  | 33.3  | 36.35 | 8.08  | 10.68 | 13.8  | 0.19   | 14.2  | 16.96   |
| Bradyrhizobium     | 0.04                             | 0.01  | 0.02  | 0.04  | 1.51  | 0.03  | 0.04  | 0.51  | 0.75   | 6.89  | 0.98    |
| Salmonella         | 5.03                             | 0.64  | 7.46  | 0.56  | 0.1   | 0.14  | 0.19  | 0.09  | 0.3    | 0.59  | 1.51    |
| Pseudomonas        | 0.13                             | 0.1   | 0.32  | 1.43  | 9.87  | 0.08  | 0.09  | 0.09  | 1.19   | 4.67  | 1.8     |
| Chlamydia          | 0.53                             | 0.01  | 13.43 | 0.01  | 0.01  | 0.01  | 0.02  | 0.01  | < 0.01 | 0.01  | 1.4     |

224

226 B) Bald Eagle

| Genus            | Individual Leg Band ID Codes |       |       |       |       |       |       |       |       |         |
|------------------|------------------------------|-------|-------|-------|-------|-------|-------|-------|-------|---------|
|                  | R/O                          | M/C   | P/O   | N/D   | M/E   | N/D   | K/2   | N/K   | D/O   | Average |
| Streptococcus    | 0.62                         | 0.49  | 0.04  | 0.01  | 0.04  | 15.49 | 19.42 | 0.02  | 28.22 | 7.15    |
| Clostridium      | 23.29                        | 0.41  | 0.37  | 0.33  | 0.42  | 0.33  | 1.29  | 0.48  | 0.32  | 3.03    |
| Bifidobacterium  | 0.01                         | 0.03  | 0.02  | 0.01  | 0.01  | 0.02  | 5.52  | 19.87 | 0.01  | 2.83    |
| Sphaerotilus     | 0.34                         | 0.05  | 17.17 | 0.07  | 0.11  | 0.16  | 0.03  | 0.07  | 0.17  | 2.02    |
| Bacteroides      | 2.23                         | 4.39  | 0.01  | 0.01  | 0.00  | 9.21  | 4.23  | 0.02  | 0.00  | 2.23    |
| Paraprevotella   | >0.01                        | 0.07  | >0.01 | >0.01 | nd*   | 0.01  | 0.10  | 12.71 | nd    | 1.43    |
| Prevotella       | 2.13                         | nd    | nd    | >0.01 | nd    | nd    | >0.01 | nd    | nd    | 1.58    |
| Bradyrhizobium   | 0.82                         | 0.13  | 0.02  | 0.14  | 0.01  | 5.99  | 0.02  | 5.14  | 0.01  | 1.37    |
| Burkholderia     | 2.14                         | 22.11 | 27.06 | 12.86 | 32.28 | 19.69 | 8.71  | 12.59 | 39.10 | 19.62   |
| Delftia          | 6.62                         | 1.06  | 11.01 | 0.35  | 41.61 | 14.51 | 0.31  | 8.70  | 4.07  | 9.80    |
| Methylophilus    | 0.01                         | 14.64 | 0.05  | 0.02  | 0.05  | 0.02  | 0.03  | 0.02  | 0.03  | 1.65    |
| Salmonella       | 12.10                        | 0.18  | 0.33  | 2.20  | 0.09  | 0.62  | 0.05  | 0.09  | 0.28  | 1.77    |
| Pseudomonas      | 17.17                        | 12.19 | 29.52 | 48.94 | 15.95 | 2.21  | 1.50  | 14.29 | 6.61  | 16.49   |
| Stenotrophomonas | 21.07                        | 0.30  | 0.17  | 20.30 | 0.08  | 18.71 | 0.25  | 0.07  | 15.36 | 8.48    |

227 \*nd = not detected

228

229

230

C) Common Raven

| Genus            | Individual Leg Band ID Codes |        |         |
|------------------|------------------------------|--------|---------|
|                  | RSYLOG                       | ROGLSG | Average |
| Psychrobacter    | 0.01                         | 12.47  | 6.24    |
| Atopostipes      | 7.11                         | 0.04   | 3.58    |
| Catelicoccus     | 18.12                        | 0.05   | 9.09    |
| Enterococcus     | 0.21                         | 14.53  | 7.37    |
| Vagococcus       | 0.15                         | 11.81  | 5.98    |
| Peptoclostridium | 0.15                         | 11.81  | 4.45    |
| Erysipelothrix   | 0.02                         | 12.64  | 6.33    |
| Afipia           | 9.39                         | 1.48   | 5.44    |
| Daeguia          | 8.85                         | >0.01  | 4.43    |
| Burkholderia     | 12.02                        | 0.36   | 6.19    |
| Delftia          | 14.27                        | 1.23   | 7.75    |
| Stenotrophomonas | 11.14                        | 5.11   | 8.12    |

231

232 Top 90<sup>th</sup> percentiles, expressed as a percentage of total, bacterial operational taxonomic units, by

233 genus in fecal samples collected from A) turkey vultures (n = 10), B) bald eagles (n = 9), and C)

234 common ravens (n = 2) captured on coastal beaches in Washington and Oregon. Letters above

235 columns are the visual identification codes on bands (eagles and ravens) or wing-tags (vultures)  
236 applied to birds at capture. Color denotes percentile category within each column.

237

238 As with genera, most of the tentatively classified bacteria species detected across all three  
239 avian species we studied comprised relatively small proportions of the overall fecal bacterial  
240 diversity (Table 3). Moreover, bacteria that were relatively abundant in one avian species in our  
241 study were less abundant or missing altogether in the other two. In turkey vulture samples, only  
242 *Fusobacterium mortiferum*, *Clostridium perfringens*, and *Clostridium ruminantium* represented  
243 over 10% each of the total bacteria species population. In bald eagles, *Burkholderia ubonensis*  
244 comprised more than 10% of all bacterial species and *Delftia tsuruhatensis* comprised nearly  
245 10%. In contrast, no bacteria species represented  $\geq 10\%$  of the total bacteria in common ravens.

246 **Table 3. Top 10<sup>th</sup> percentiles of bacterial operational taxonomic units tentatively classified to the closest species match in fecal**  
 247 **samples of turkey vultures, bald eagles and common ravens.**

| <b>Turkey Vulture (n = 10)</b>                | <b>Number of OTUs<br/>(% of total)</b> | <b>Bald Eagle (n = 9)</b>               | <b>Number of OTUs<br/>(% of total)</b> | <b>Common Raven (n = 2)</b>                       | <b>Number of OTUs<br/>(% of total)</b> |
|-----------------------------------------------|----------------------------------------|-----------------------------------------|----------------------------------------|---------------------------------------------------|----------------------------------------|
| <i>Fusobacterium mortiferum</i>               | 25,100 (17.0)                          | <i>Burkholderia ubonensis</i>           | 5,870 (17.8)                           | <i>Catelicoccus marimammalium</i>                 | 5,632 (9.1)                            |
| <i>Clostridium perfringens</i>                | 21,764 (14.7)                          | <i>Delftia tsuruhatensis</i>            | 3,229 (9.8)                            | <i>Delftia tsuruhatensis</i>                      | 4,801 (7.7)                            |
| <i>Clostridium ruminantium</i>                | 16,684 (11.3)                          | <i>Stenotrophomonas spp.</i>            | 2,598 (7.9)                            | <i>Stenotrophomonas spp.</i>                      | 4,748 (7.7)                            |
| <i>Ruminococcus spp.</i>                      | 7,943 (5.4)                            | <i>Streptococcus sanguinis</i>          | 2,229 (6.8)                            | <i>Enterococcus faecalis</i>                      | 4,476 (7.2)                            |
| <i>Peptostreptococcus spp.</i>                | 7,526 (5.1)                            | <i>Pseudomonas spp.</i>                 | 2,212 (6.7)                            | <i>Erysipelothrix tonsillarum</i>                 | 3,924 (6.3)                            |
| <i>Peptoniphilus methionivorax</i>            | 6,046 (4.1)                            | <i>Pseudomonas veronii</i>              | 1,706 (5.2)                            | <i>Burkholderia ubonensis</i>                     | 3,493 (5.6)                            |
| <i>Atopobium minutum</i>                      | 5,560 (3.8)                            | <i>Pseudomonas<br/>plecoglossicida</i>  | 1,240 (3.8)                            | <i>Afipia spp.</i>                                | 3,369 (5.4)                            |
| <i>Peptoclostridium clostridium sordellii</i> | 2,771 (1.9)                            | <i>Bifidobacterium<br/>thermophilum</i> | 933 (2.8)                              | <i>Peptoclostridium clostridium<br/>sordellii</i> | 2,754 (4.4)                            |
| <i>Clostridium septicum</i>                   | 2,374 (1.6)                            | <i>Clostridium spp.</i>                 | 728 (2.2)                              | <i>Daeguia caeni</i>                              | 2,745 (4.4)                            |
| <i>Lactobacillus hayakitensis</i>             | 2,336 (1.6)                            | <i>Sphaerotilus spp.</i>                | 665 (2.0)                              | <i>Psychrobacter proteolyticus</i>                | 2,394 (3.9)                            |
| <i>Peptostreptococcus anaerobius</i>          | 2,323 (1.6)                            | <i>Salmonella enterica</i>              | 584 (1.8)                              | <i>Atopostipes spp.</i>                           | 2,202 (3.6)                            |
| <i>Enterococcus faecalis</i>                  | 2,299 (1.6)                            | <i>Burkholderia spp.</i>                | 575 (1.7)                              | <i>Vagococcus carniphilus</i>                     | 2,133 (3.4)                            |
| <i>Salmonella enterica</i>                    | 2,235 (1.5)                            | <i>Bacteroides spp.</i>                 | 575 (1.7)                              | <i>Vagococcus teuberi</i>                         | 1,534 (2.5)                            |
| <i>Lactobacillus aviarius</i>                 | 2,178 (1.5)                            | <i>Methylophilus spp.</i>               | 544 (1.7)                              | <i>Psychrobacter pulmonis</i>                     | 1,431 (2.3)                            |
| <i>Cellulosilyticum spp.</i>                  | 2,174 (1.5)                            | <i>Proteiniphilum<br/>acetatigenes</i>  | 472 (1.4)                              | <i>Ignatzschineria larvae</i>                     | 1,226 (2.0)                            |
| <i>Chlamydia chlamydophila psittaci</i>       | 2,071 (1.4)                            | <i>Afipia spp.</i>                      | 444 (1.3)                              | <i>Gardnerella vaginalis</i>                      | 974 (1.6)                              |
| <i>Anaerovorax spp.</i>                       | 1,901 (1.3)                            | <i>Bradyrhizobium spp.</i>              | 437 (1.3)                              | <i>Enhydrobacter aerosaccus</i>                   | 965 (1.6)                              |
| <i>Holdemania spp.</i>                        | 1,495 (1.0)                            | <i>Methylothera spp.</i>                | 429 (1.3)                              | <i>Pelomonas aquatica</i>                         | 893 (1.4)                              |
| <i>Bradyrhizobium spp.</i>                    | 1,407 (1.0)                            | <i>Prevotella spp.</i>                  | 423 (1.3)                              | <i>Pseudomonas spp.</i>                           | 869 (1.4)                              |
| <i>Pseudomonas spp.</i>                       | 1,140 (0.8)                            | <i>Sphingobacterium spp.</i>            | 360 (1.1)                              | Other <sup>a</sup>                                |                                        |
| <i>Campylobacter spp.</i>                     | 1,100 (0.7)                            | <i>Ralstonia spp.</i>                   | 319 (1.0)                              |                                                   |                                        |
| <i>Burkholderia ubonensis</i>                 | 1,065 (0.7)                            | <i>Cytophaga hutchinsonii</i>           | 315 (1.0)                              |                                                   |                                        |
| <i>Stenotrophomonas spp.</i>                  | 929 (0.6)                              | <i>Tepidimonas spp.</i>                 | 314 (1.0)                              |                                                   |                                        |
| <i>Vagococcus carniphilus</i>                 | 859 (0.6)                              | <i>Paenibacillus barengoltzii</i>       | 246 (0.7)                              |                                                   |                                        |

*Thioalkalivibrio  
denitrificans*

241 (0.7)

---

Sum of top 10 Percentile

121,280 (82.3)<sup>b</sup>

27,447 (84.0)<sup>b</sup>

54,276 (81.5)<sup>b</sup>

---

248 Top 10<sup>th</sup> percentiles of bacterial operational taxonomic units sequenced from fecal samples of bald eagles, turkey vultures and

249 common ravens captured on coastal beaches in Washington and Oregon. Sequences detected in at least two avian species are

250 identified in bold (includes two in the footnote).

251 <sup>a</sup>Bacteria not in top 10 percentile, nevertheless comprising 1.1 - 1.3% of the total: *Acinetobacter johnsonii*, *Cosenzaea proteus*

252 *myxofaciens*, ***Salmonella enterica***, ***Clostridium spp.***, *Staphylococcus epidermidis*. Bacteria shown in bold were also found in turkey

253 vulture and bald eagle samples.

254 <sup>b</sup>Percent of total bacterial operational taxonomic units included in the top 10<sup>th</sup> percentile.

255 Archaea were identified in one turkey vulture sample and in two bald eagle samples. We  
256 tentatively classified these as uncultured *Candidatus nitrosocaldus*. No Archaea were identified  
257 in common ravens-

258

## 259 **Discussion**

260 Our analyses showed substantial microbiome diversity among turkey vultures, bald  
261 eagles, and common ravens. These differences probably represent their diverse anatomies,  
262 physiologies, and also to an extent, differences in diet. Turkey vultures, bald eagles and common  
263 ravens are among the many terrestrial vertebrates that scavenge opportunistically on the Pacific  
264 Northwest coast [20] and also inland from the coast. It should be noted that ceca, which act as  
265 sites of anaerobic activity in some species of birds, are vestigial in all three of our study species  
266 [21].

267 The authors are aware that bacteria species classification based upon V4 is tentative. The  
268 classification of ribosomal RNA genes has been the gold standard for molecular taxonomic  
269 research for decades, but standard primers for bacterial species identification does not exist yet  
270 [22]. On the other hand, sequences of the most commonly identified bacterial genera and species  
271 (those that are the 10 top percentile) in this study exist in the databases. These bacteria were not  
272 environmental or novel bacteria. For this reason, we discuss not only bacteria class, order, and  
273 phylum, but also genus and species.

274 Two classes, Fusobacteria and Clostridia, which are comprised exclusively of anaerobes,  
275 predominated the cloacal flora in turkey vultures. Roggnbuck et al. [23] also reported these two  
276 classes as most prevalent in turkey vultures. *Fusobacterium mortiferum* , which on average



277 comprised 17% of all bacterial species detected in Turkey Vulture feces, is a normal inhabitant  
278 of the alimentary tract in chickens where it protects against pathogenic bacteria [24].

279 Many clostridia species are normal gut flora and play a crucial role in gut homeostasis,  
280 however under stressful gut conditions (i.e. inflammation, parasitism, etc) these bacteria may  
281 release toxins that can cause serious diseases in humans and other animals, including birds [25,  
282 26]. *Clostridium perfringens* and *C. ruminantium* accounted for 26% of the bacterial species we  
283 detected in turkey vulture feces in our study. *C. perfringens* is known to be a normal component  
284 of intestinal flora, but can cause necrotic enteritis in birds when intestinal dysbiosis occurs [27].  
285 *C. ruminantium* is reported to contribute to rumen fermentation in cattle and it is also a food-  
286 spoiling bacterium, but it has not been directly linked to animal diseases [28].

287 Bacterial toxins can also be present in carrion. Turkey vultures have a remarkable  
288 tolerance for some of these toxins, such as botulinum [29, 30] and anthrax [23, 31]. Only 0.3% of  
289 sequences assembled from turkey vultures feces were identified as *C. botulinum* and no *Bacillus*  
290 *anthracis* was detected in these birds. Neither of the aforementioned species was present in bald  
291 eagles or common raven samples.

292 Most *Enterococcus* (phylum Firmicutes) are commensal bacteria; however there are a  
293 few species in this genus, including *E. faecalis*, that are associated with significant mortality in  
294 humans and other animals [32, 33]. *Enterococcus faecalis* comprised 7.2 % of the bacterial  
295 OTUs in the two common ravens we sampled and 1.6% in the turkey vultures. While this  
296 bacterium was detected in all nine bald eagle fecal samples, they comprised < 0.1% of the  
297 assembled sequences for that species. In Illinois, 25 raptors were tested for *Enterococcus* due to  
298 their potential to develop resistance to antibiotics; 53 of 56 cloacal samples collected contained  
299 *E. faecalis* [34]. *Streptococcus sanguinis* (phylum Firmicutes) comprised nearly 7% of all

300 bacteria in bald eagles but  $\leq 0.3\%$  in turkey vultures and common ravens, Although these  
301 bacteria are considered normal inhabitants of mammals and humans [35], there is no information  
302 about the commonality of these bacteria or their significance in the digestive tracts of avian  
303 species. *Erysipelothrix tonsillarum* comprised 6% of the OTUs in the two common raven fecal  
304 samples and  $< 0.1\%$  in turkey vultures and bald eagles. These non-pathogenic bacteria are  
305 commonly isolated from healthy swine and poultry as well as poultry litter. *E. tonsillarum* is  
306 closely related to the pathogenic species *E. rhusiopathae*, causative agent of erysipeloid in  
307 mammals and erysipelas in poultry [36, 37].

308       Almost 70% of fecal bacteria in the bald eagles we sampled ( $n = 9$ ) and 55% in the two  
309 common ravens belonged to the phylum Proteobacteria. In contrast, Proteobacteria accounted for  
310 less than 10% of the turkey vulture microbiome ( $n = 10$ ). In bald eagles, the most common  
311 species belonging to this phylum were tentatively classified as *Burkholderia ubonensis* and  
312 *Delftia tsuruhatensis*, comprising 18% and 10% of all fecal bacteria detected respectively. Both  
313 are common environmental bacteria that have been occasionally linked to infections in humans  
314 [38, 39]. *B. ubonensis* was also detected in the two common ravens sampled, ranking seventh  
315 most common and averaging 5.6%. *Catelicoccus marimammalium* was the most common  
316 bacteria in the common ravens sampled, averaging 9% of the total. *C. marimammalium* was the  
317 most common species in the feces of gulls in Wisconsin, U.S.A. [40].

318       Other notable bacteria detected from the Proteobacteria phylum included bacteria in  
319 *Escherichia*, *Campylobacter*, *Pseudomonas*, and *Salmonella*. *E. coli* inhabits the large intestine  
320 and distal ileum of most vertebrate species, including birds; the organism is shed in the feces.  
321 Generally-speaking, the vast majority of the strains are components of normal intestinal flora and  
322 are non-pathogenic. Some strains are of low virulence and may cause opportunistic infections. A

323 few are highly pathogenic and may cause septicemia. *E. coli* sequences were detected in the  
324 cloacal samples from eight of the ten turkey vultures, eight of the nine bald eagles, and both  
325 ravens. However, *E. coli* sequences were sparse and, on average, accounted for less than 0.01%  
326 of all the bacterial OTUs per bird. No further analysis was done on these *E. coli* sequences to  
327 determine if they had any pathogenic genes or not. *Campylobacter* sp. were detected in all the  
328 fecal samples from turkey vultures and accounted for 0.7% of the bacterial OTUs (Table 3). In  
329 bald eagles and common ravens, *Campylobacter* sp. were also detected in all samples, but the  
330 OTU frequency was less than 0.01%. Members of *Pseudomonas* are ubiquitous and can be  
331 opportunistic pathogens [41]. Bacteria from the *Pseudomonas* genus were detected in all fecal  
332 samples. They constituted 17% of the fecal flora in bald eagles, but < 2% of all bacterial OTUs  
333 in turkey vultures and common ravens.

334 Avian predators may become infected with *Salmonella* when they consume infected  
335 animals [42]. *S. enterica* colonize the intestinal tract and have been isolated from wild birds with  
336 or without clinical signs of disease [43]. In our study, *S. enterica* comprised 1-2% of bacterial  
337 species detected in all three avian scavengers. In other research, *S. enterica* sampled from the  
338 feces of scavenging birds ranged from 1% to 20% by isolation [44-46]. Differences in prevalence  
339 between isolation and detection by meta-analysis may be due to the stability of the DNA  
340 molecule that can be amplified even when the target organism is no longer viable. *S. enterica*  
341 sequence was performed only to the species level, and subspecies or serotype were not  
342 determined.

343 Archaea are single-celled prokaryotes that are difficult to culture [47]. They have been  
344 found in the digestive tracts of some animals where they produce methane [48]; the role these  
345 organisms play in the gut of birds is still unknown [1]. *Candidatus nitrosocaldus* is ubiquitous in

346 water environments being present in plankton, sediments, and surrounding soils of lakes and  
347 oceans [49]. It has a particular affinity for hot spring environments. It is also common in waste  
348 water treatment plants and fertilized soils. Its presence in the feces of two bald eagles and one  
349 turkey vulture in our study may be a reflection of their contact with marine carrion.

350 In summary, this is the first study utilizing metagenomics to investigate the fecal  
351 microbiome to the species level. This is also the first meta-analysis performed in bald eagles and  
352 common ravens. We demonstrated that the fecal flora varies among the three scavenger species  
353 even though they live in the same region and consume some of the same foods (D. Varland,  
354 unpub. data). We discovered that over 50% of the microbiota in the cloaca belongs to a single  
355 phylum in all three species, Proteobacteria for bald eagles and common ravens and Firmicutes  
356 for turkey vultures. As expected numerous species of microorganisms were tentatively identified;  
357 however, only about 10% of these tentative species contained > 1% of the OTUs. Finally, this  
358 method for identification and characterization of microorganism populations can be used in  
359 epidemiological, pathogen detection, and microbial diversity studies.

360

## 361 **Acknowledgements**

362 We thank the Washington State Parks and Recreation Commission and the Oregon Parks  
363 and Recreation Department for allowing vehicle access to coastal beaches, which was essential  
364 to our work. We also greatly appreciate the field assistance of many, including Nathalie Denis,  
365 Glenn Marquardt, Larry Warwick, Sandra Miller, Pam McCauley, Suzy Whittey, Tom Rowley  
366 and Dale Larson. D. Varland color marked birds in the study under federal banding permit 21417  
367 and under state Scientific Collection Permits 13-014, 14-084 and 15-093 in Washington and  
368 under Scientific Taking Permit 049-13 in Oregon.

369

## 370 **References**

- 371 1. Waite DW, Taylor MW. Exploring the avian gut microbiota: current trends and future  
372 directions. *Front Microbiol.* 2015;6:673. Epub 3 July 2015.
- 373 2. Gomez-Alvarez V, Revetta RP, Domingo JWS. Metagenomic analyses of drinking water  
374 receiving different disinfection treatments. *Appl Environ Microb.* 2012;78(17):6095-102.
- 375 3. Tizard IR. Salmonellosis in wild birds. *Seminars in Avian and Exotic Pet Medicine.*  
376 2004;13(2):50-66.
- 377 4. Tarello W. Etiologic agents and diseases found associated with clinical aspergillosis in  
378 falcons. *Intern J Micro.* 2011;2011:176963. doi: 10.1155/2011/176963.
- 379 5. Hernández J, Lindberg P, Waldenström J, Drobni M, Olsen B. A novel *Salmonella*  
380 serovar isolated from Peregrine Falcon (*Falco peregrinus*) nestlings in Sweden: *Salmonella*  
381 *enterica enterica* serovar Pajala (*Salmonella* Pajala). *Infection Ecology and Epidemiology.*  
382 2012;2:10.3402/iee.v2i0.7373. Epub 2012 Aug 3. doi: 10.3402/iee.v2i0.7373. PubMed Central  
383 PMCID: PMC3432136.
- 384 6. Maeda I, Siddiki MSR, Nozawa-Takeda T, Tsukahara N, Tani Y, Naito T, et al.  
385 Population abundance of potentially pathogenic organisms in intestinal microbiome of jungle  
386 crow (*Corvus macrorhynchos*) shown with 16s rna gene-based microbial community analysis.  
387 *BioMed Res Int.* 2013;2013:438956, 5 pages.
- 388 7. Kovatcheva-Datchary P, Zoetendal EG, Venema K, Vos WMd, Smidt H. Tools for the  
389 tract: understanding the functionality of the gastrointestinal tract. *Ther Adv Gastroenter.*  
390 2009;2(4 Supplement):9-22. doi: 10.1177/1756283X09337646.

- 391 8. Colston TJ, Jackson CR. Microbiome evolution along divergent branches of the  
392 vertebrate tree of life: what is known and unknown. *Mol Ecol.* 2016;25(16):3776-800. doi:  
393 <https://doi.org/10.1111/mec.13730>.
- 394 9. Waite DW, Deines P, Taylor MW. Gut Microbiome of the Critically Endangered New  
395 Zealand Parrot, the Kakapo (*Strigops habroptilus*). *PLoS One.* 2012;7(4):e35803. doi:  
396 10.1371/journal.pone.0035803.
- 397 10. Varland DE. A capture to remember: Monitoring the health of avian scavengers on the  
398 pacific coast. *J Av Med Surg.* 2015;29(3):250-6.
- 399 11. Varland DE, Smallwood JA, Young LS, Kochert MN. Marking techniques. In: Bird DM,  
400 Bildstein KL, editors. *Raptor Research and management Techniques*. Blaine, WA U.S.A. and  
401 Surrey, B.C. Canada: Hancock House Publishers; 2007. p. 221-36.
- 402 12. McCollough MA. Molting sequence and aging of bald eagles. *Wilson Bull.*  
403 1989;101(1):1-10.
- 404 13. Pyle P, editor. *Identification guide to North American birds. Part II. Point Reyes Station,*  
405 *California: Slate Creek Press; 2008.*
- 406 14. Marzluff JM. Common Raven. In: del Hoyo J, Elliott A, Christie DA, editors. *Handbook*  
407 *of the Birds of the World. 14, Bush-Shrikes to Old World Sparrows.* Barcelona, Spain: Lynx;  
408 2009.
- 409 15. Bortolotti GR. Sexual size dimorphism and age-related size variation in Bald Eagles *J*  
410 *Wild Managem.* 1984;48(1):72-81.
- 411 16. Bedrosian B, Loutsch J, Craighead D. Using morphometrics to determine the sex of  
412 common ravens. *Northwestern Naturalist.* 2008;89(Spring):46-52.

- 413 17. Boarman WI, Heinrich B. Common raven. In: Poole AF, Gill FB, editors. The Birds of  
414 North America. version 2.0 ed. Ithaca, NY, USA: Cornell lab of Ornithology; 1999.
- 415 18. Bolyen E, Rideout JR, Dillon MR, Bokulich NA, Abnet C, Al-Ghalith GA, et al. QIIME  
416 2: Reproducible, interactive, scalable, and extensible microbiome data science. PeerJ Preprints.  
417 2018;6(1):e27295v1.
- 418 19. Yadav S, Kumar A, Gupta M, Maitra SS. Cross-reactivity of prokaryotic 16S rDNA-  
419 specific primers to eukaryotic DNA: Mistaken microbial community profiling in environmental  
420 samples. Curr Microbiol. 2018;75(8):1038-45. Epub 2018 Apr 2. doi: 10.1007/s00284-018-1482-  
421 4.
- 422 20. Varland DE, Buchanan JB, Fleming TL, Kenney MK, Vanier C. Scavenging as a food-  
423 acquisition strategy by peregrine falcons. J Raptor Res. 2018;52(3):291-308.
- 424 21. Clench M, Mathias J. The avian cecum: A review. Wilson Bull. 1995;107(1):93-121.
- 425 22. Mizrahi-Man O, Davenport ER, Gilad Y. Taxonomic classification of bacterial 16s rna  
426 genes using short sequencing reads: Evaluation of effective study designs. PLoS One.  
427 2013;8(1):e53608.
- 428 23. Roggenbuck M, Schnell IB, Blom N, Bælum J, Bertelsen MF, Sicheritz-Pontén T, et al.  
429 The microbiome of New World vultures. Nature Communications. 2014;5:5498. doi:  
430 10.1038/ncomms6498.
- 431 24. Portrait V, Cottenceau G, Pons AM. A *Fusobacterium mortiferum* strain produces a  
432 bacteriocin-like substance(s) inhibiting *Salmonella* Enteritidis. Lett Appl Microbiol.  
433 2000;31(2):115-7.
- 434 25. Popoff MR, Bouvet P. Clostridial Toxins. Future Microbiol. 2009;4(8):1021-64. doi:  
435 <https://doi.org/10.2217/fmb.09.72>.

- 436 26. Lopetuso LR, Scaldaferri F, Petito V, Gasbarrini A. Commensal Clostridia: leading  
437 players in the maintenance of gut homeostasis. *Gut Pathog.* 2013;5:23. doi:  
438 <https://doi.org/10.1186/1757-4749-5-23>.
- 439 27. Cooper KK, Songer JG, Uzal FA. Diagnosing clostridial enteric disease in poultry. *JVDI.*  
440 2013;25(3):314–27.
- 441 28. Reida R, Burgessa CM, McCabea E, Fanningb S, Whyteb P, Kerryc J, et al. Real-time  
442 PCR methods for the detection of blown pack spoilage causing *Clostridium* species; *C.*  
443 *estertheticum*, *C. gasigenes* and *C. ruminantium*. *Meat Sci.* 2017;133:56-60. doi:  
444 <http://dx.doi.org/10.1016/j.meatsci.2017.06.001>.
- 445 29. Kalmbach ER. American vultures and the toxin of clostridium botulinum. *JAVMA.*  
446 1939;94:187-91.
- 447 30. Ohishi I, Sakaguchi G, Riemann H, Behymer D, Hurvell B. Antibodies to Clostridium  
448 botulinum toxins in free-living birds and mammals. *J Wild Dis.* 1979 15(1):3-9.
- 449 31. Darling ST, Bates LB. Anthrax of animals in Panama, with a note on its probable mode  
450 of transmission by buzzards. *Am Vet Rev.* 1912;42:70-5.
- 451 32. Ellerbroek LK, Mac N, Peters J, Hultquist L. Hazard potential from antibiotic-resistant  
452 commensals like Enterococci. *J Med Vet A.* 2004;51:393-9.
- 453 33. Silva N, Igrejas G, Gonçalves A, Poeta P. Commensal gut bacteria: distribution of  
454 *Enterococcus* species and prevalence of *Escherichia coli* phylogenetic groups in animals and  
455 humans in Portugal. *Annals Microbiol.* 2012;62(2):449-59.
- 456 34. Marrow J, Whittington JK, Mitchell M, Hoyer LL, Maddox C. Prevalence and antibiotic-  
457 resistance characteristics of *Enterococcus* spp. isolated from free-living and captive raptors in  
458 central Illinois. *J Wild Dis.* 2009;45(2):302-13.



- 459 35. Caufield PW, Dasanayake AP, Yihong Li YP, Hsu J, Hardin JM. Natural history of  
460 *Streptococcus sanguinis* in the oral cavity of infants: Evidence for a discrete window of  
461 infectivity. *Infect Immun*. 2000;68(7):4018-23. doi: 10.1128/IAI.68.7.4018-4023.2000.
- 462 36. Takahashi T, Fujisawa T, Benn Y, Tamura Y, Sawada T, Suzuk S, et al. *Erysipelothrix*  
463 *tonsillarum* sp. nov. isolated from tonsils of apparently healthy pigs. *Int J Syst Bacteriol*.  
464 1987;37(2):166-8.
- 465 37. Eriksson H, Bagge E, Båverud V, Fellström C, Jansson DS. *Erysipelothrix rhusiopathiae*  
466 contamination in the poultry house environment during erysipelas outbreaks in organic laying  
467 hen flocks. *Avian Pathol*. 2014;43(3):231-7. doi:  
468 <http://dx.doi.org/10.1080/03079457.2014.907485>.
- 469 38. Price EP, Sarovich DS, Webb JR, Hall CM, Jaramillo SA, Sahl JW, et al.  
470 Phylogeographic, genomic, and meropenem susceptibility analysis of *Burkholderia ubonensis*.  
471 *PLoS Neglected Tropical Diseases*. 2017;11(9):e0005928. doi:  
472 <https://doi.org/10.1371/journal.pntd.0005928>.
- 473 39. Ranc A, Dubourg G, Fournier PE, Raoult D, Fenollar F. *Delftia tsuruhatensis*, an  
474 Emergent Opportunistic Healthcare-Associated Pathogen. *Emerg Infect Dis*. 2018;24(3):594-6.  
475 doi: <https://doi.org/10.3201/eid2403.160939>.
- 476 40. Koskey AM, Fisher JC, Traudt MF, Newton RJ, McLellan SL. Analysis of gull fecal  
477 microbial community reveals dominance of *Catelicoccus marimammalium* in relation to  
478 culturable enterococci. *Appl Environ Microb*. 2014;80:757-65. Epub 15 November 2013. doi:  
479 10.1128/AEM.02414-13.

- 480 41. Abdul-Aziz T, Barnes HJ. Miscellaneous and Sporadic Bacteria Infections. In: Swayne  
481 DE, Glisson JR, McDougald LR, Nolan LK, Suarez DL, Nair V, editors. Diseases of Poultry.  
482 13th ed. Ames, IA: Wiley-Blackwell; 2013. p. 1017-27.
- 483 42. Benskin CM, Wilson K, Jones K, Hartley IR. Bacterial pathogens in wild birds: a review  
484 of the frequency and effects of infection. Biol Rev Camb Philos. 2009;84:349-73.
- 485 43. Henderson SC, Bounous DI, Lee MD. Early events in the pathogenesis of avian  
486 salmonellosis. Infect Immun. 1999;67:3580-6.
- 487 44. Janecko N, Čížek A, Halová D, Karpíšková R, Myšková P, Literák I. Prevalence,  
488 characterization and antibiotic resistance of *Salmonella* isolates in large corvid species of Europe  
489 and North America between 2010 and 2013. Zoonoses Public Hlth. 2015; 62(4):292-300. Epub  
490 2014 Aug 7. doi: 10.1111/zph.12149.
- 491 45. Reche MP, Jiménez PA, Alvarez F, Ríos JEGdl, Rojas AM, Pedro Pd. Incidence of  
492 *Salmonellae* in captive and wild free-living raptorial birds in central Spain. J Med Vet A.  
493 2003;50(1):42-4.
- 494 46. Sulzner K, Kelly T, Smith W, Johnson CK. Enteric pathogens and antimicrobial  
495 resistance in turkey vultures (*Cathartes aura*) feeding at the wildlife-livestock interface. J Zoo  
496 Wild Med. 2014 45(4):931-4. doi: <http://dx.doi.org/10.1638/2012-0217.1>.
- 497 47. Childers R, Reno P, Olson R. Prevalence and geographic range of *Nadelspora canceri*  
498 (Microspora) in Dungeness crab *Cancer magister*. Dis Aquat Organ. 1996;24:135-42.
- 499 48. Danielsson R, Dicksved J, Sun L, Gonda H, Müller B, Schnürer A, et al. Methane  
500 production in dairy cows correlates with rumen methanogenic and bacterial community structure.  
501 Front Microbiol. 2017;8:226. Epub 17 February 2017. doi: 10.3389/fmicb.2017.00226.

502 49. Abby SS, Melcher M, Kerou M, Krupovic M, Stieglmeier M, Rossel C, et al. *Candidatus*  
503 *Nitrosocaldus cavascurens*, an ammonia oxidizing, extremely thermophilic archaeon with a  
504 highly mobile genome. *Front Microbiol.* 2018;9(January):Article 28. doi:  
505 <https://doi.org/10.3389/fmicb.2018.00028>.

506

## 507 **Supporting information**

508 **S1 Figure. Proportions of bacterial operational taxonomic units by phylum.** Proportions of  
509 bacterial operational taxonomic units by phylum detected in fecal samples from turkey vultures  
510 (n = 10), bald eagles (n = 9), and common ravens (n = 2) captured in coastal Washington and  
511 Oregon. Letters below columns are the visual identification codes on bands (eagles and ravens)  
512 or wing-tags (vultures) applied to birds at capture. Proportions < 1% are not shown.

513

514 **S2 Figure. Hierarchal Clustering of Taxonomic Data.** Evaluation of the taxonomic  
515 classification data using a dual hierarchal dendrogram. Each sample is clustered on the X-axis  
516 labeled based on the sampled species. Samples with more similar microbial populations are  
517 mathematically clustered closer together. The heatmap represents the relative percentages of  
518 each genus. The predominant genera are represented along the right Y-axis. The legend for the  
519 heatmap is provided in the upper left corner. The microbial population of Turkey Vultures  
520 (n=10) is distinct from the population identified in the Bald Eagle (n=9).

521 **S1 Table. Pairwise ANOSIM Results (Weighted UniFrac)**

522 Significant differences present in the weighted UniFrac distance matrix values were identified  
523 using the Analysis of Similarities (ANOSIM) Test and differences between groups identified  
524 using multiple pairwise comparisons over 999 permutations.

| Group 1     | Group 2       | Sample size | R <sup>a</sup> | p-value | q-value |
|-------------|---------------|-------------|----------------|---------|---------|
| BALDEAGLE   | COMMONRAVEN   | 11          | 0.204204       | 0.239   | 0.239   |
| BALDEAGLE   | TURKEYVULTURE | 19          | 0.928121       | 0.001   | 0.003   |
| COMMONRAVEN | TURKEYVULTURE | 12          | 0.81087        | 0.015   | 0.0225  |

525 *<sup>a</sup>R scales from +1 to -1. A value of +1 indicating the most similar samples are in the same*  
526 *group. A value equal to 0 indicating there is no relationship observed between similar and*  
527 *dissimilar samples.*

528 **S2 Table. Mean number (and percent) of bacterial operational taxonomic units by phylum.**

529 Mean number (and percent) of bacterial operational taxonomic units by phylum detected in fecal  
 530 samples from turkey vultures (n = 10), bald eagles (n = 9), and common ravens (n = 2) captured  
 531 on coastal beaches in Washington and Oregon. For each species, phyla with the largest number  
 532 of operational taxonomic units are identified in bold.

| Phylum           | Turkey Vulture   |               | Bald Eagle      |               | Common Raven    |               |
|------------------|------------------|---------------|-----------------|---------------|-----------------|---------------|
|                  | Mean             | (Percent)     | Mean            | (Percent)     | Mean            | (Percent)     |
| Acidobacteria    | 5.7              | (< 0.1)       | 0.2             | (< 0.1)       | ND <sup>a</sup> | ND            |
| Actinobacteria   | 5441             | (4.3)         | 2,033.8         | (5.4)         | 951             | (2.1)         |
| Bacteroidetes    | 261.4            | (0.2)         | 2,912.2         | (8.3)         | 336.5           | (0.4)         |
| Chlamydiae       | 2,000            | (1.4)         | 6.9             | (< 0.1)       | 5.5             | (< 0.1)       |
| Cyanobacteria    | 7.3              | (< 0.1)       | 195.3           | (0.6)         | 150.5           | (0.2)         |
| Deferribacteres  | 19.2             | (< 0.1)       | 0.1             | (< 0.1)       | ND              | ND            |
| Firmicutes       | <b>10,6044.8</b> | <b>(67.1)</b> | <b>4,937.4</b>  | <b>(13.6)</b> | <b>27,467</b>   | <b>(40.9)</b> |
| Fusobacteria     | <b>22,873.3</b>  | <b>(17.3)</b> | 81.2            | (0.2)         | 61.5            | (0.1)         |
| Gemmatimonadetes | 4.1              | (< 0.1)       | 111.4           | (0.3)         | 1               | (< 0.1)       |
| Ignavibacteriae  | 7.9              | (< 0.1)       | 208.3           | (0.6)         | 1               | (< 0.1)       |
| Proteobacteria   | 11,345.5         | (9.7)         | <b>22,445.3</b> | <b>(70.9)</b> | <b>32,631</b>   | <b>(55.5)</b> |
| Spirochaetes     | 2.4              | (< 0.1)       | 0.3             | (< 0.1)       | 372.5           | (0.9)         |
| Tenericutes      | 2.1              | (< 0.1)       | ND              | ND            | ND              | ND            |

533 <sup>a</sup> ND = Not detected.

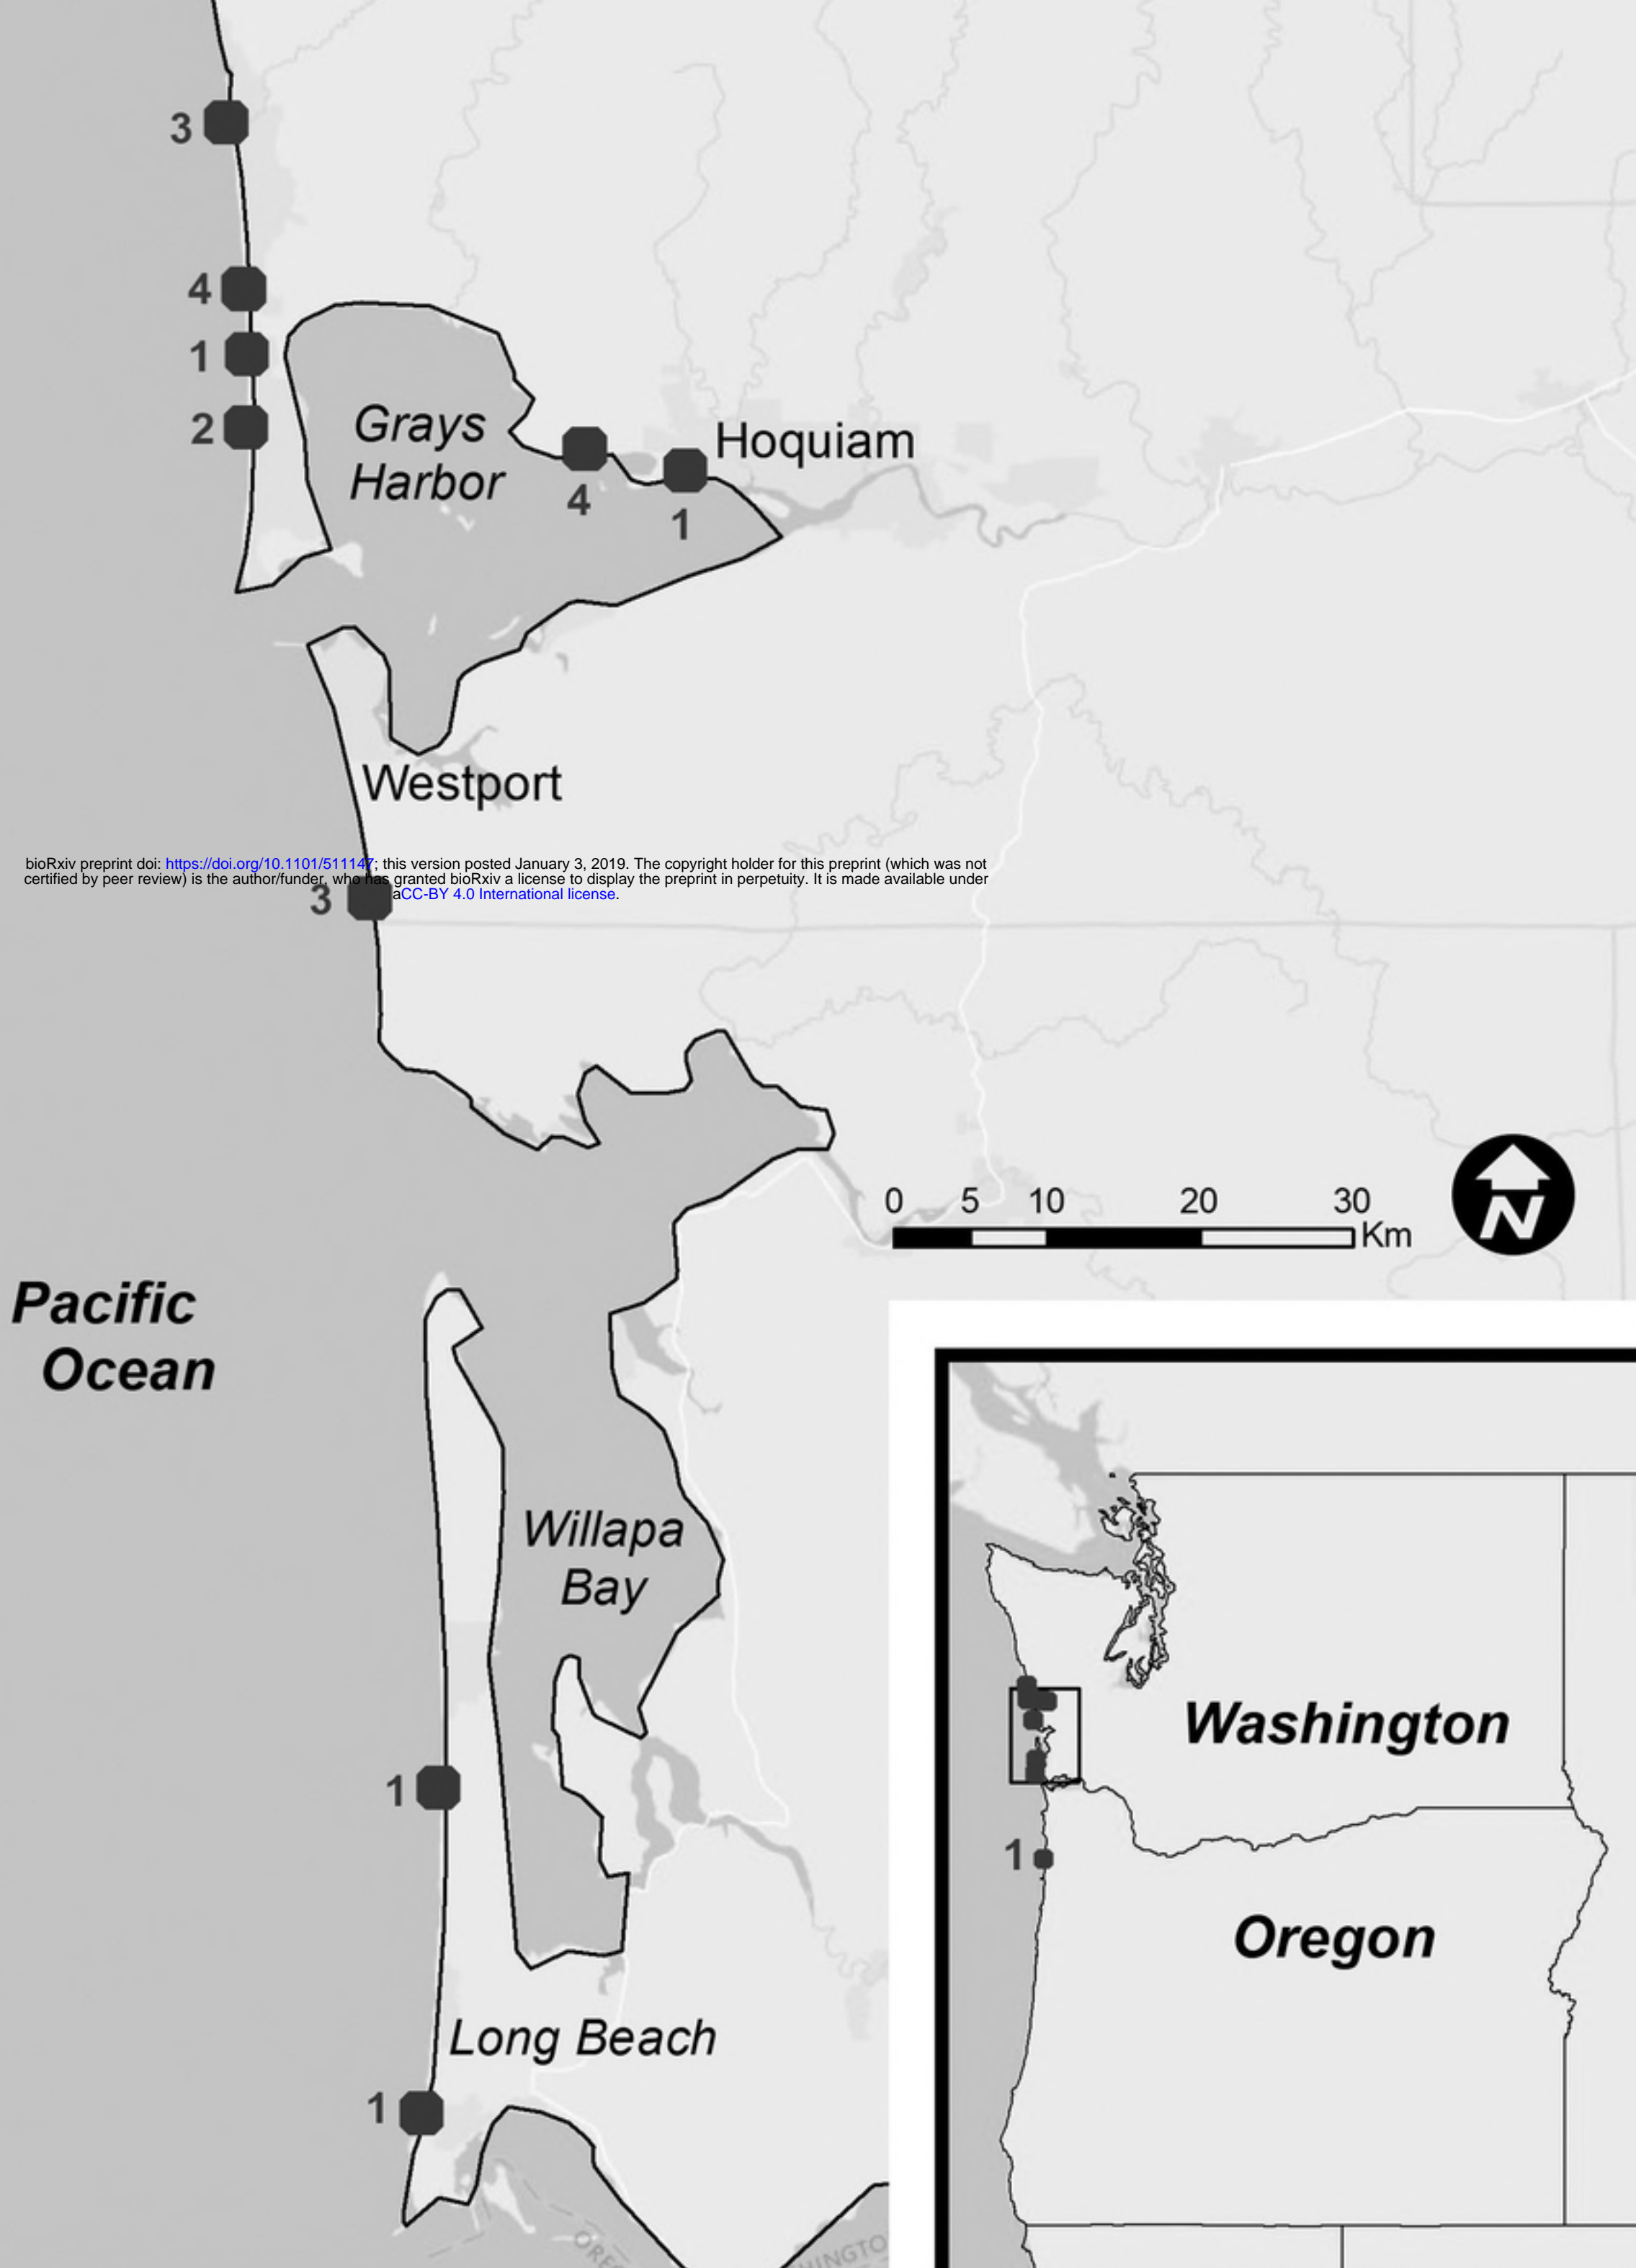

Figure 1

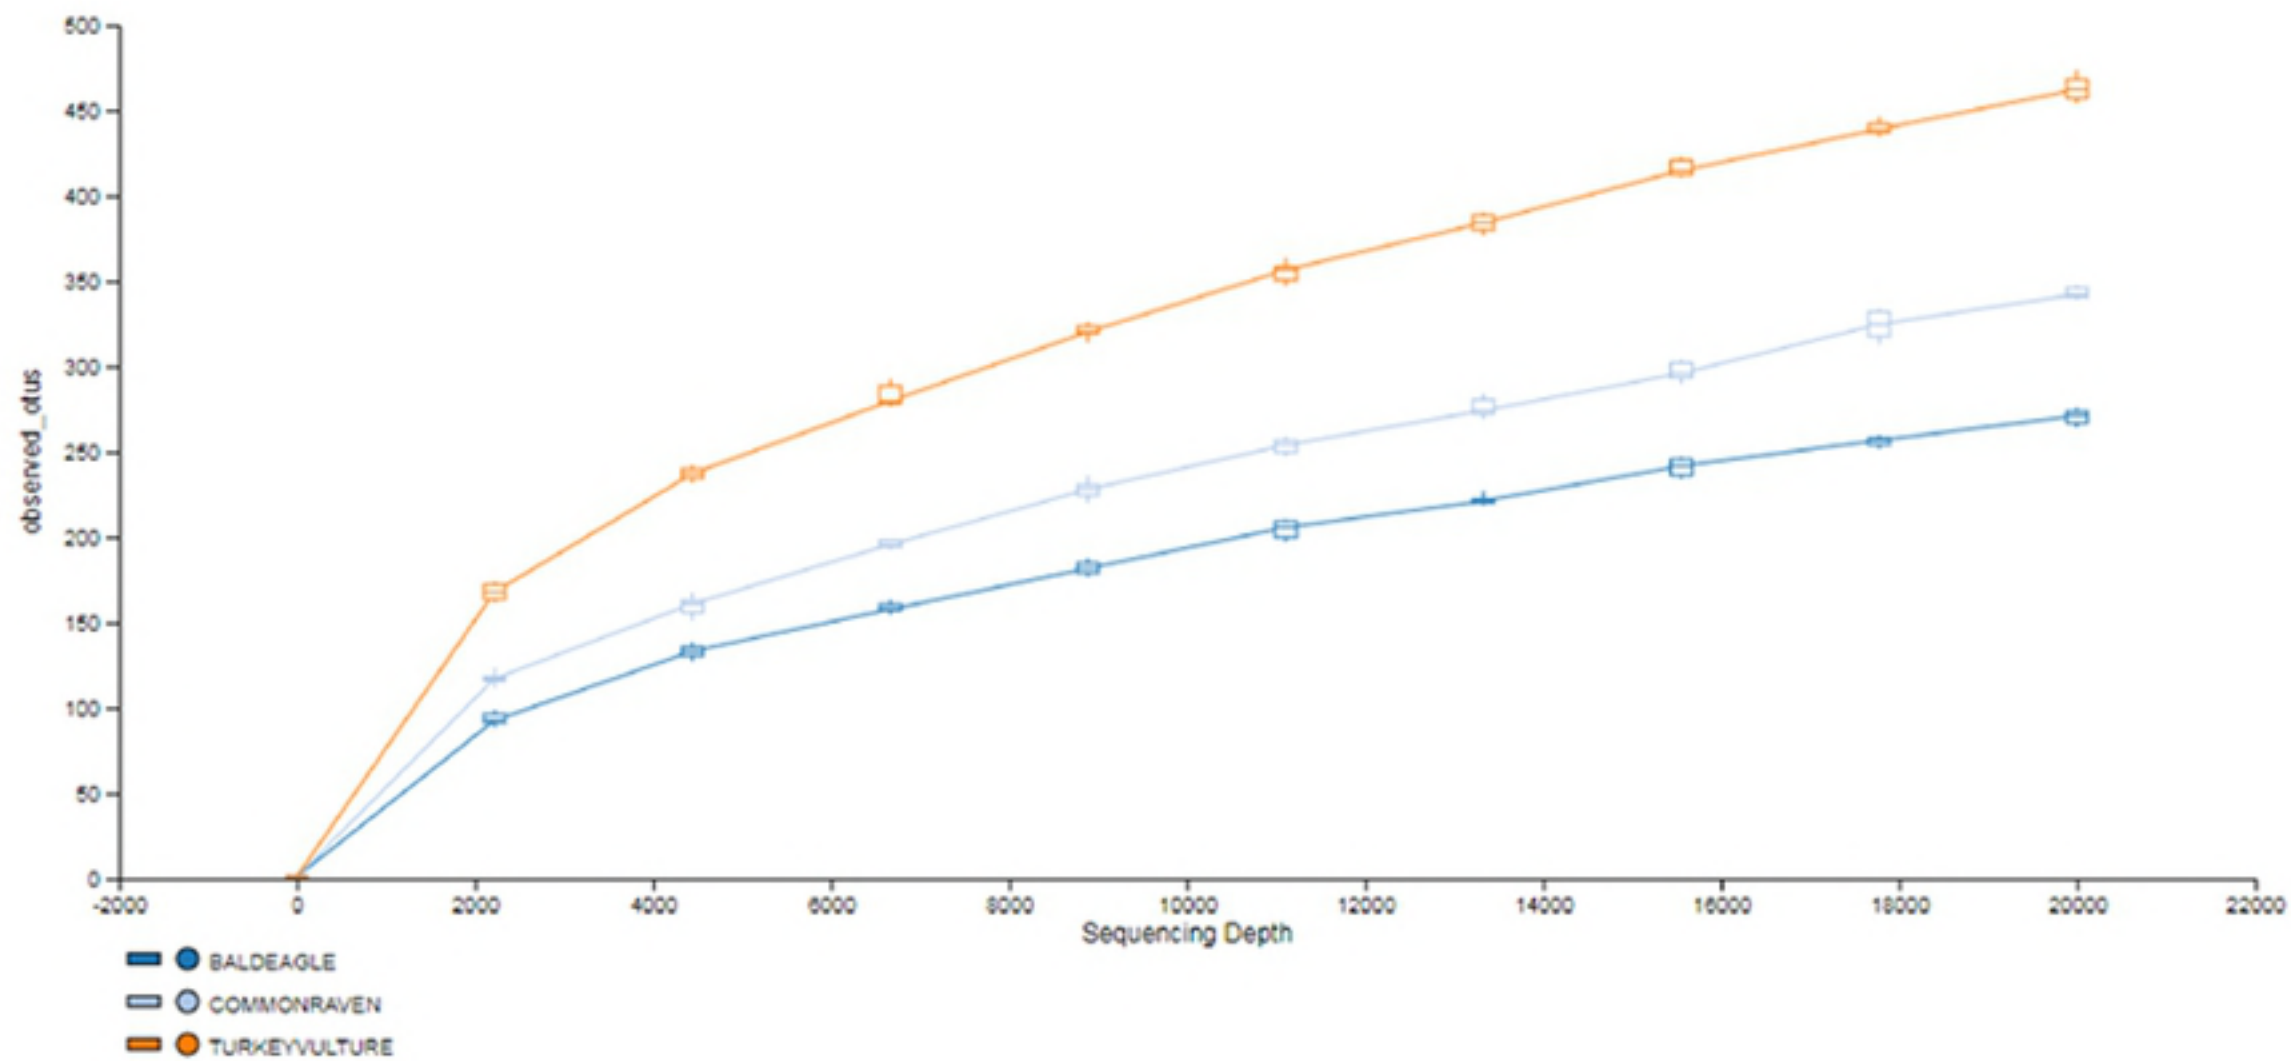

Figure 2a



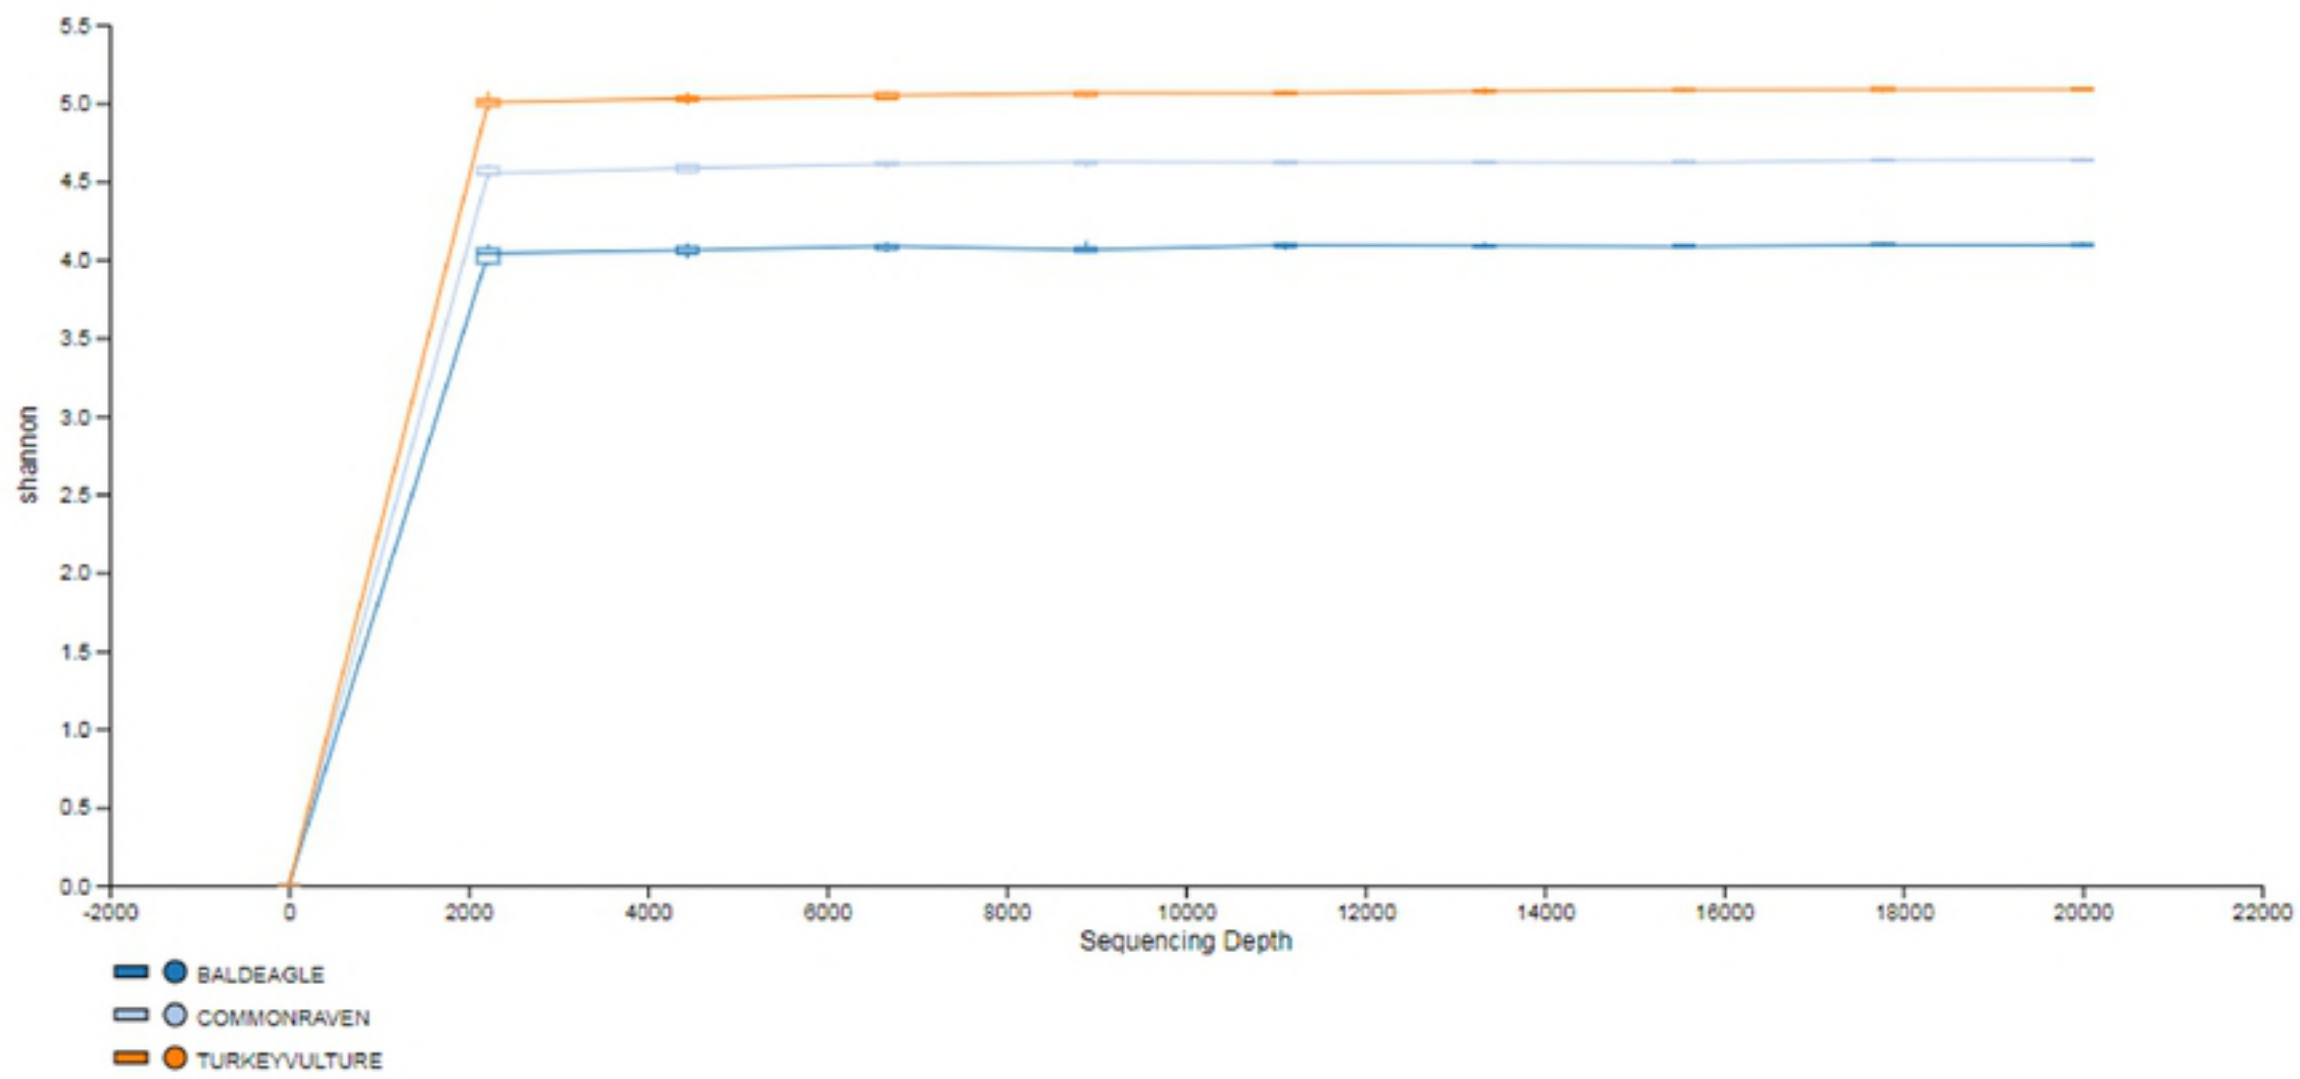

Figure 2b

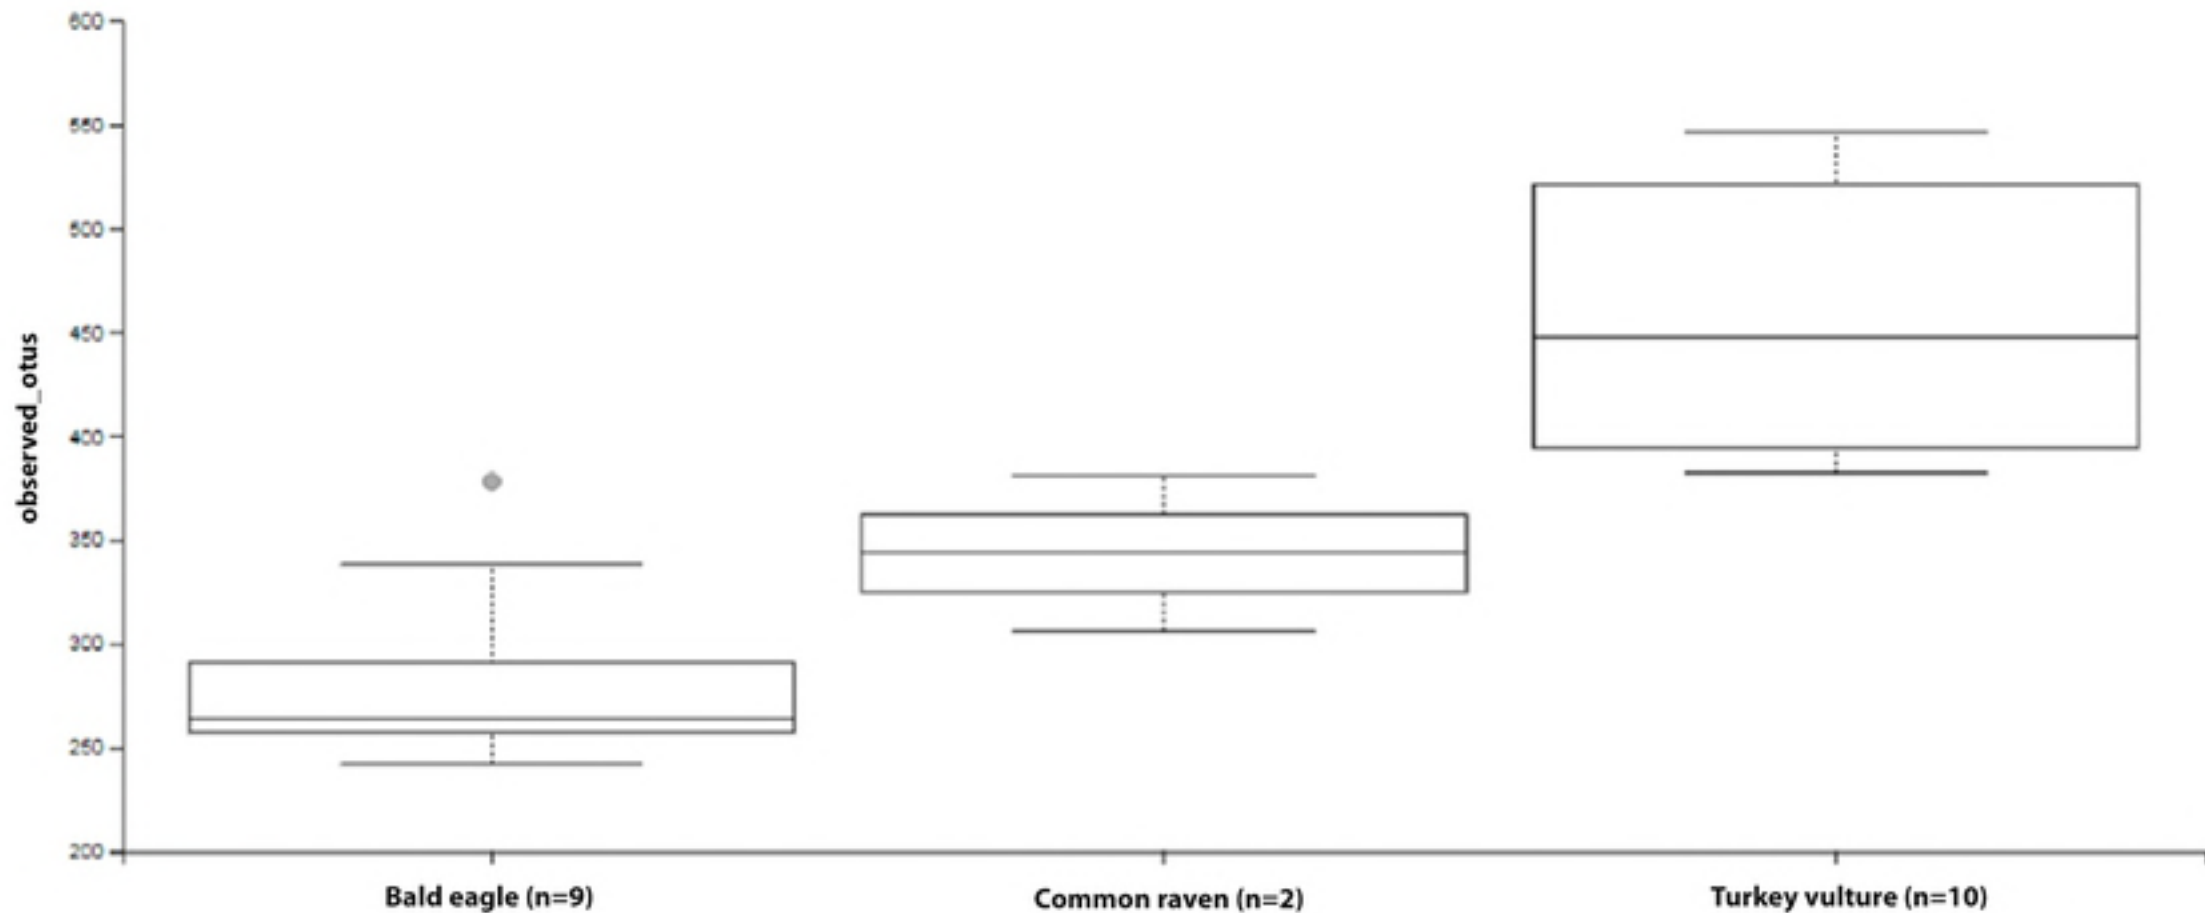

| Groups           |                       |      |             |            |
|------------------|-----------------------|------|-------------|------------|
| Group 1          | Group 2               | H    | p-value     | q-value    |
| Bald eagle (n=9) | Turkey vulture (n=10) | 13.5 | 0.000238563 | 0.00071569 |

Figure 3a

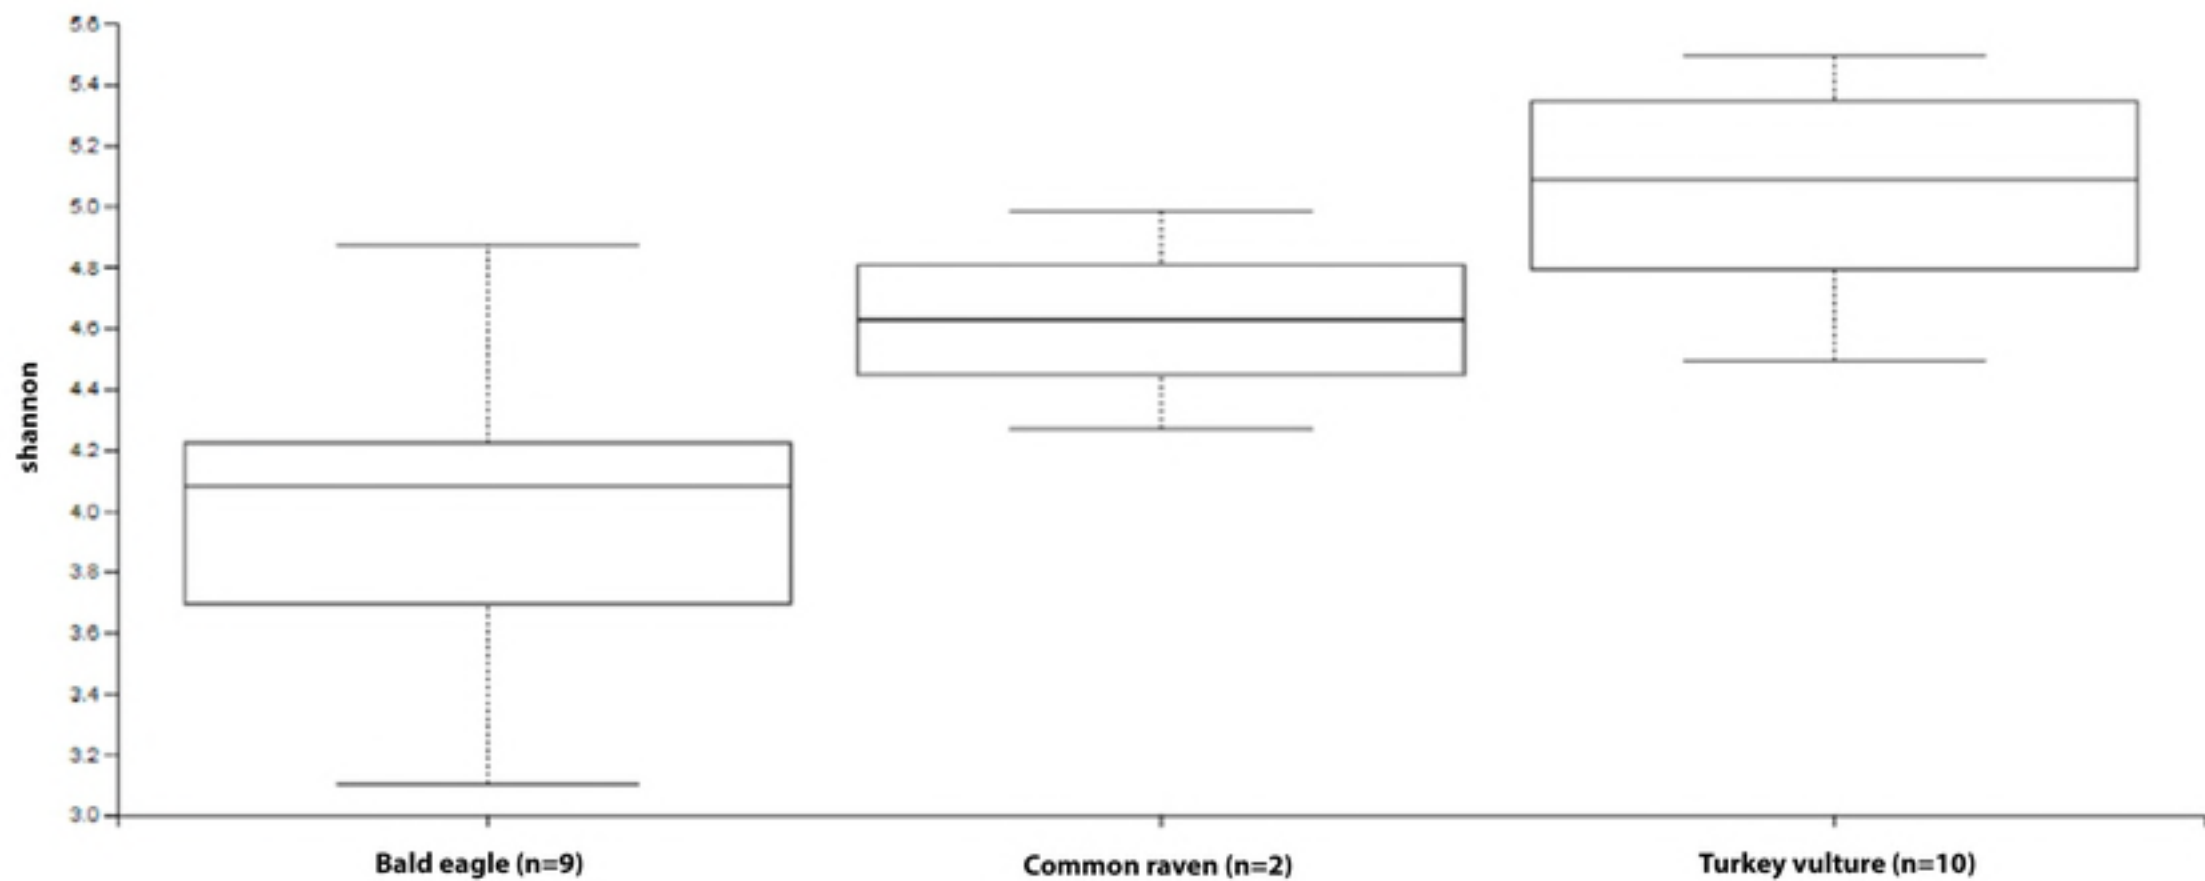

| Groups           |                       |       |             |             |
|------------------|-----------------------|-------|-------------|-------------|
| Group 1          | Group 2               | H     | p-value     | q-value     |
| Bald eagle (n=9) | Turkey vulture (n=10) | 11.76 | 0.000605172 | 0.001815517 |

Figure 3b

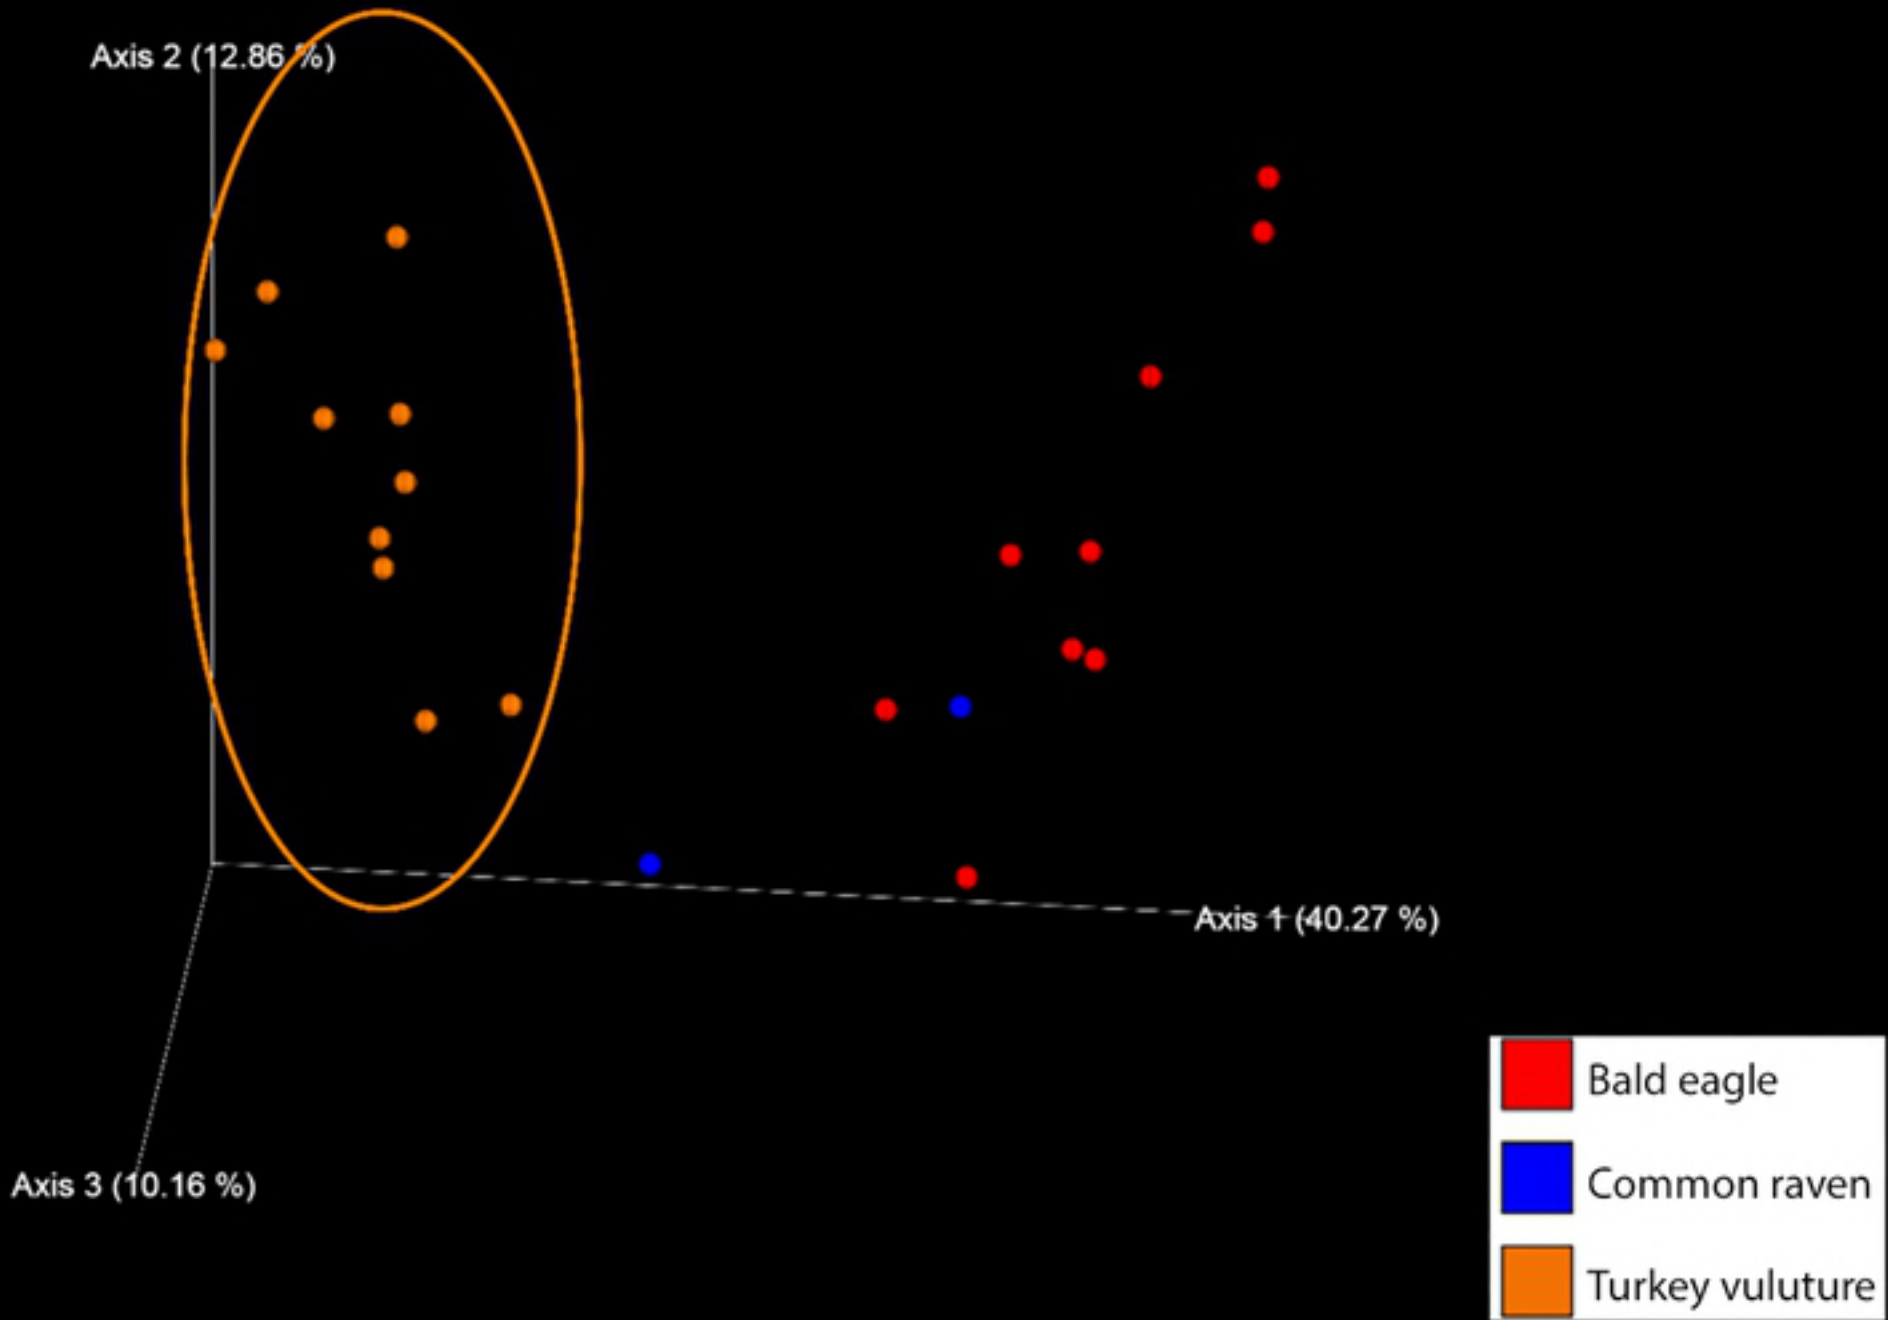

Figure 4

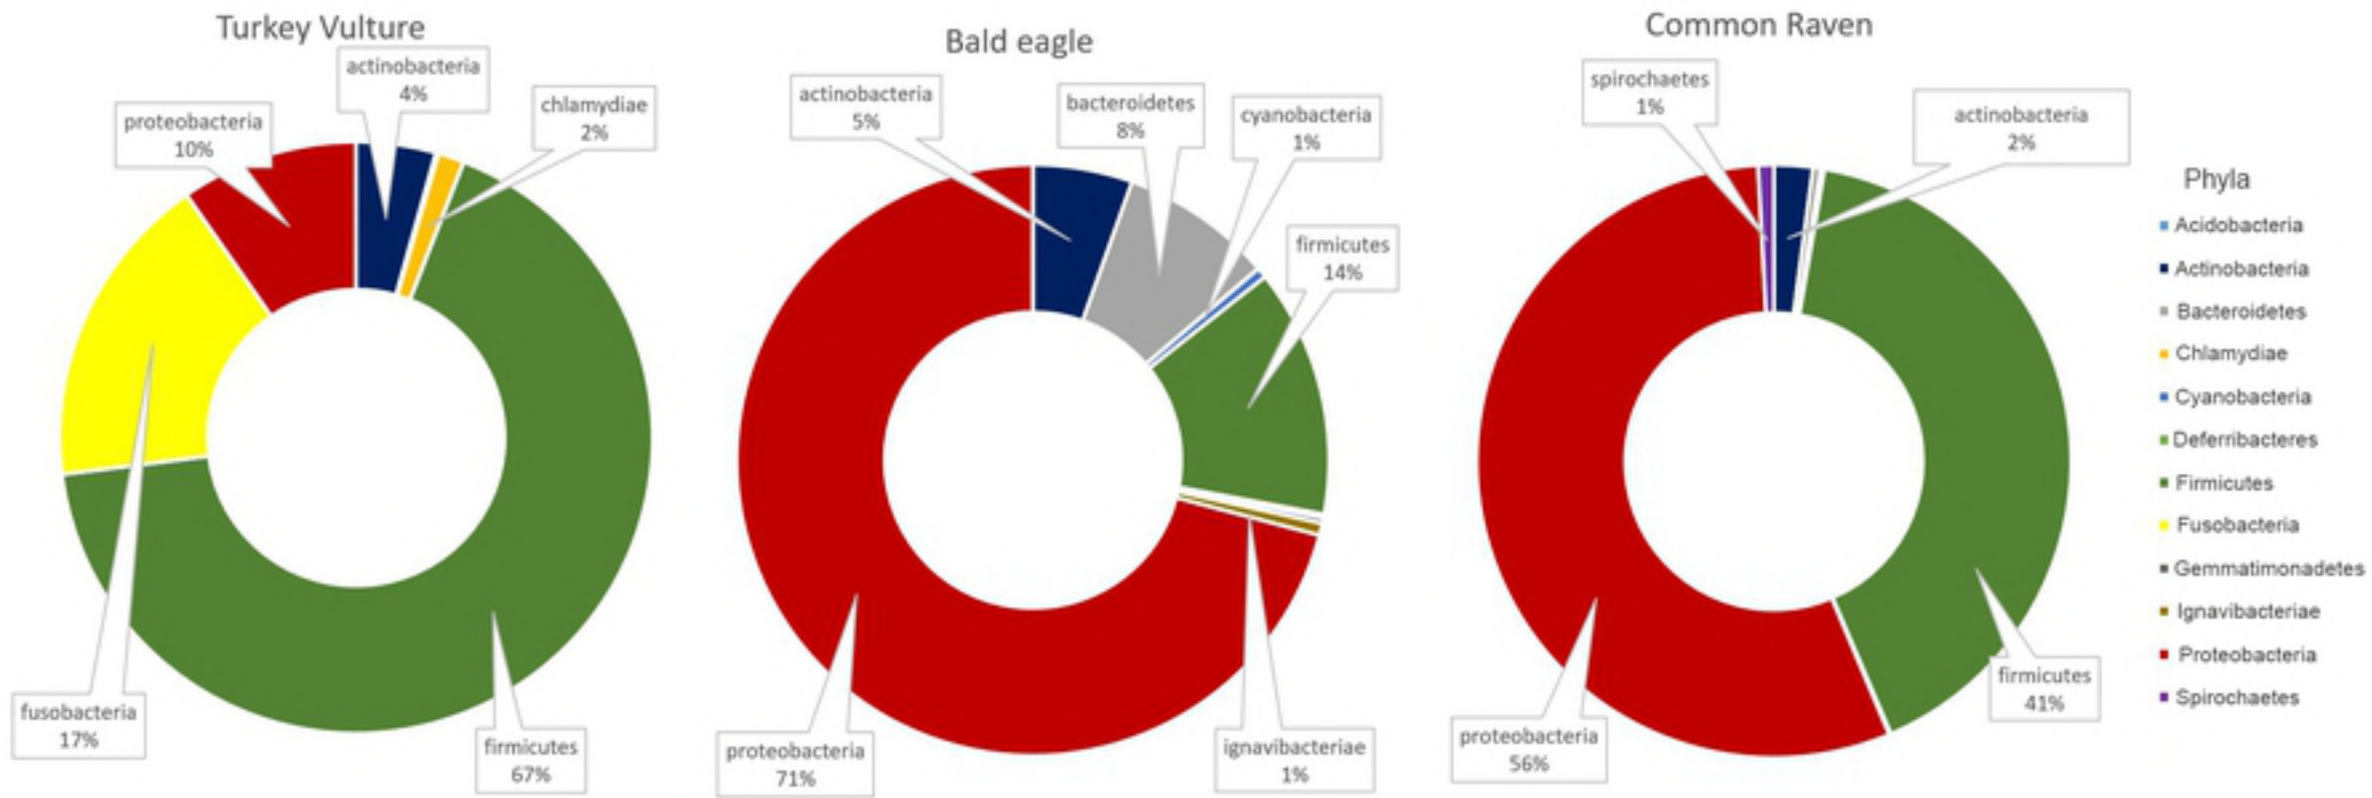

Figure 5

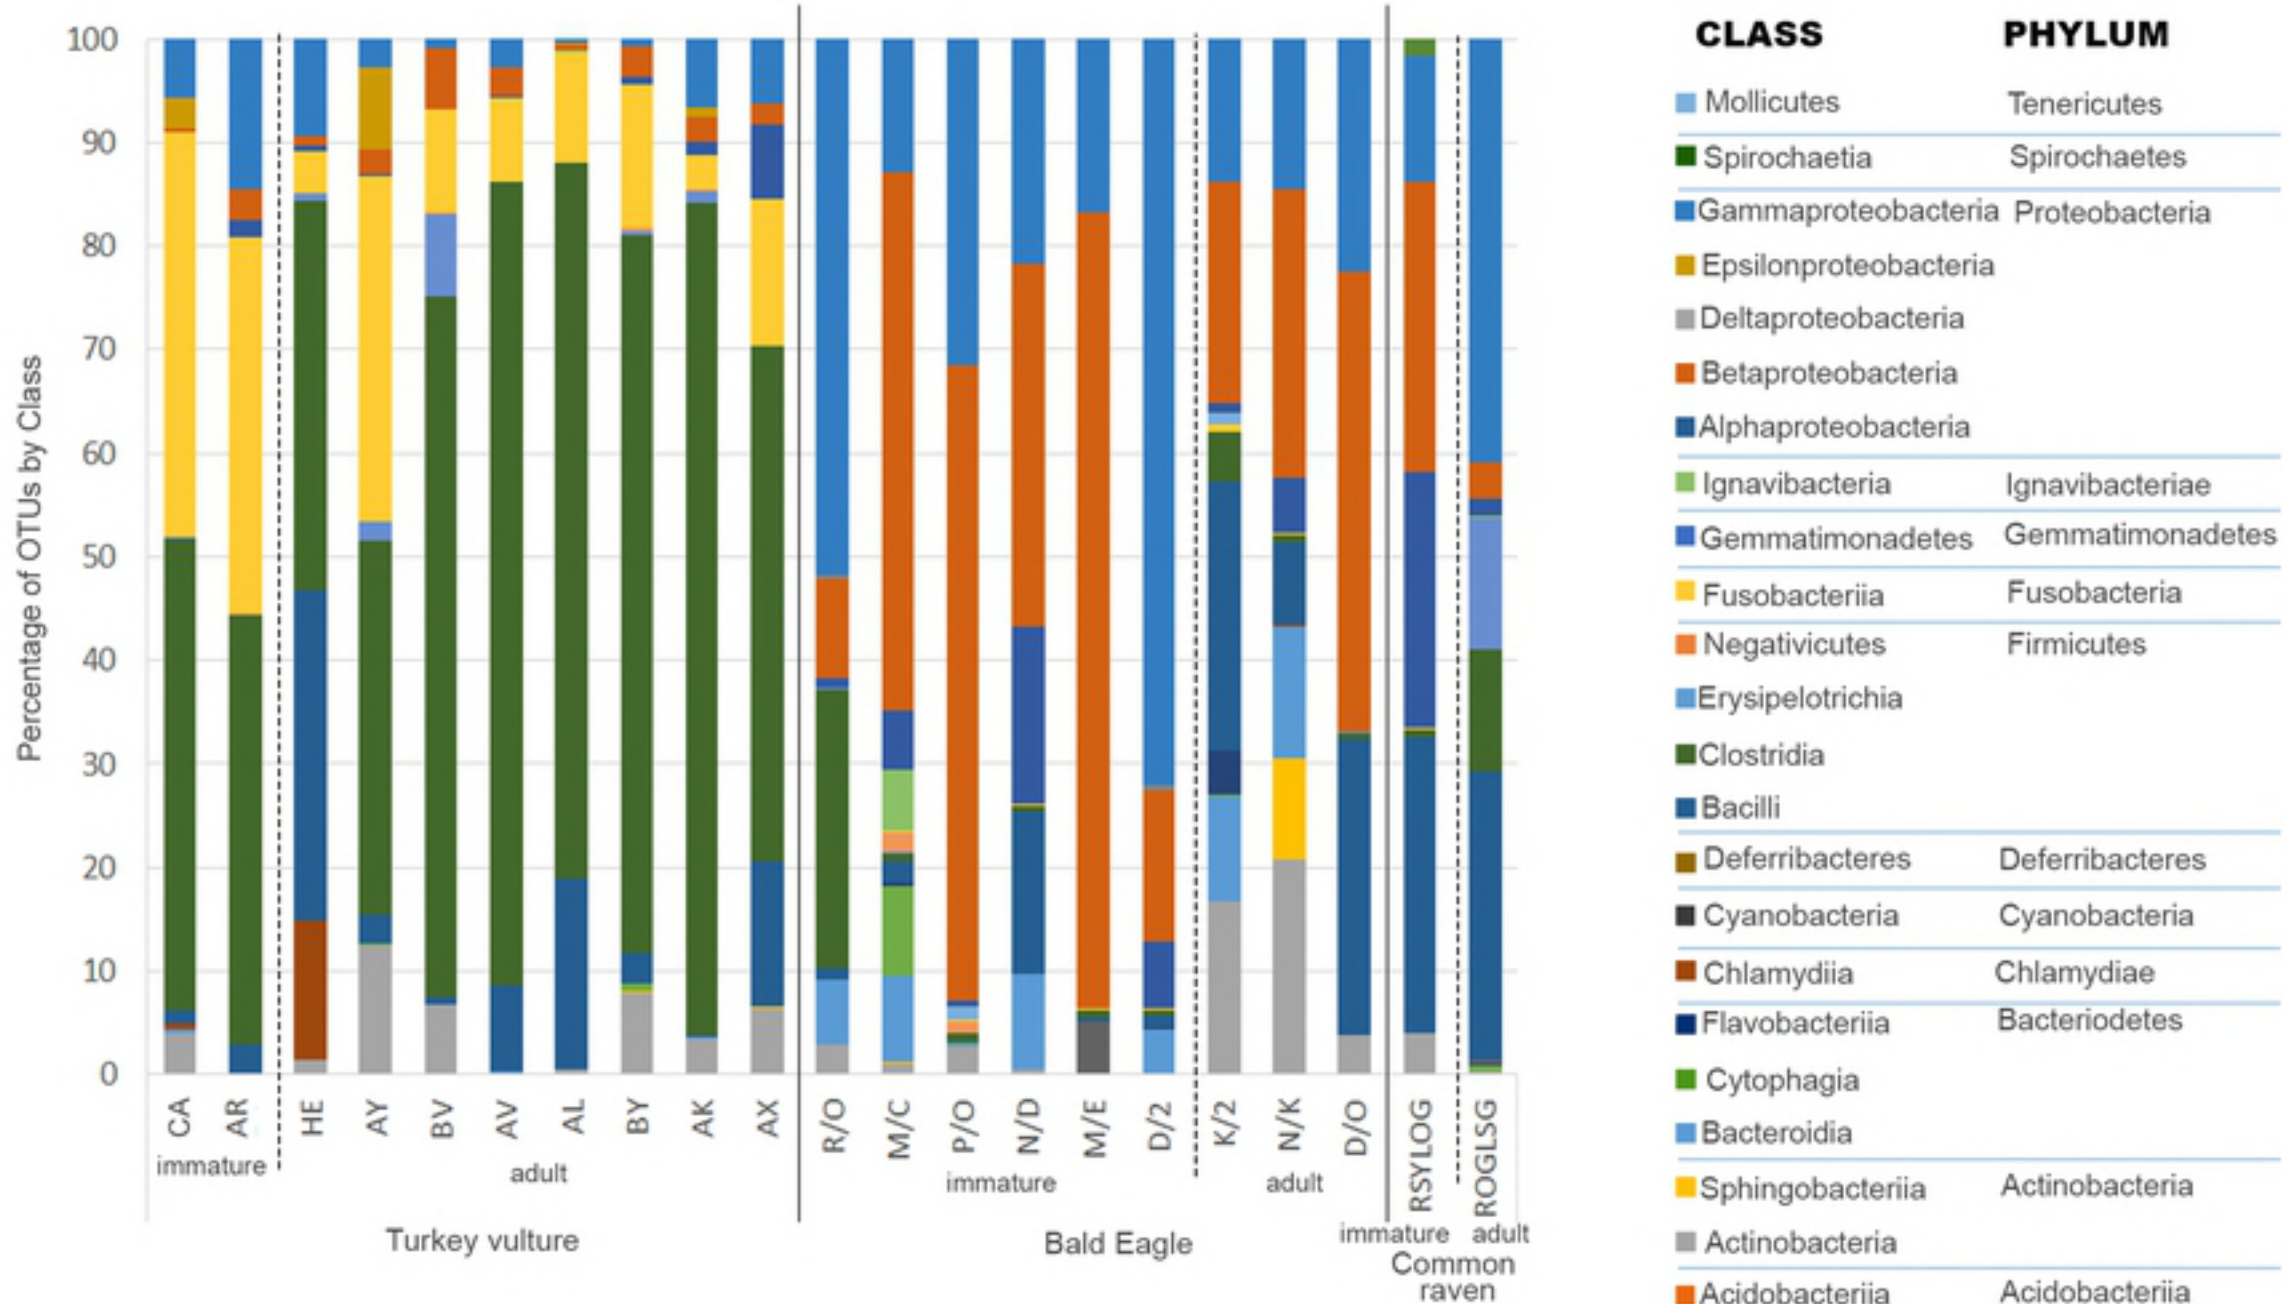

Figure 6
